## Proper chromosome alignment depends on BRCA2 phosphorylation by PLK1

Åsa Ehlén<sup>1,2</sup>, Charlotte Martin<sup>1,2†</sup>, Manon Julien<sup>3,4†</sup>, Simona Miron<sup>3†</sup>, François-Xavier Theillet<sup>3</sup>, Virginie Boucherit<sup>1,2</sup>, Patricia Duchambon<sup>5,6</sup>, Ahmed El Marjou<sup>5,7</sup>, Sophie Zinn-Justin<sup>3</sup>, Aura Carreira<sup>1,2,\*</sup>

<sup>1</sup>Institut Curie, PSL Research University, CNRS, UMR3348, F-91405, Orsay, France

<sup>2</sup>Paris Sud University, Paris-Saclay University CNRS, UMR3348, F-91405 Orsay, France

<sup>3</sup>Institute for Integrative Biology of the Cell (I2BC), CEA, CNRS, Univ Paris-Sud, Université Paris-Saclay, Gif-sur-Yvette Cedex, France

<sup>4</sup>Department of Biology, École Normale Supérieure, 94230 Cachan, France

<sup>5</sup>Protein Expression and Purification Core Facility, Institut Curie, 26 rue d'Ulm, 75248 Paris Cedex 05, France

<sup>6</sup>INSERM U1196, 91405 Orsay Cedex, France

<sup>7</sup>CNRS UMR144, 12 rue Lhomond, 75005 Paris, France

† Equal contributors

\*To whom correspondence should be addressed:

Aura Carreira  
Institut Curie - Research Center  
UMR 3348 CNRS "Genotoxic Stress and Cancer"  
Bâtiment 110, Centre Universitaire  
91405 Orsay  
France  
Phone: +33 (0)1 69 86 30 82  
Fax: +33 (0)1 69 86 94 29  
E-mail: [aura.carreira@curie.fr](mailto:aura.carreira@curie.fr)

## Summary

The BRCA2 tumor suppressor protein is involved in the maintenance of genome integrity through its role in homologous recombination (HR) in S/G2 phases of the cell cycle. In mitosis, BRCA2 participates in the spindle assembly checkpoint (SAC) via its interaction with the SAC component BUBR1 and is involved in cytokinesis.

BRCA2 is phosphorylated by the cell cycle regulator Polo-like kinase 1 (PLK1), although the functional relevance of this phosphorylation remains unclear. Here we show that proper chromosome alignment depends on BRCA2 phosphorylation by PLK1. We combined nuclear magnetic resonance spectroscopy, isothermal titration calorimetry and cell biology to characterize the phenotype of *BRCA2* variants that alter PLK1 phosphorylation. We identified T207 of BRCA2 as a *bona fide* docking site for PLK1 required for the phosphorylation of BUBR1 and the full alignment of the chromosomes at the metaphase plate. Precluding T207 binding to PLK1 as observed in *BRCA2* missense variants identified in breast cancer results in reduced phosphorylation of BUBR1 at PLK1-dependent sites leading to severe chromosome misalignment and segregation errors. We thus reveal a direct role of BRCA2 in the alignment of chromosomes separate from DNA repair. These findings may explain in part the aneuploidy observed in *BRCA2*-deficient tumors.

## Keywords

BRCA2; chromosome alignment; variants of uncertain significance (VUS); PLK1; Phosphorylation; BUBR1; Mitosis

## Introduction

The BRCA2 tumor suppressor protein plays an important role in DNA repair by homologous recombination<sup>1,2</sup> which takes place preferentially during S/G2 phases of the cell cycle<sup>3</sup>. In mitosis, BRCA2 binds to the spindle assembly component BUBR1<sup>4</sup>, facilitating the acetylation/deacetylation of the latter<sup>5,6</sup>, which provides evidence for a role of BRCA2 in the spindle assembly checkpoint (SAC). BRCA2 also localizes to the midbody and facilitates cell division by serving as a scaffold protein for the central spindle components<sup>7-9</sup>. Also in mitosis, BRCA2 is phosphorylated by PLK1 both in its N-terminal region<sup>10</sup> and in its central region<sup>11</sup>, although the functional role of these phosphorylation events remains unclear.

PLK1 is a master regulator of the cell cycle, especially in mitosis<sup>12,13</sup>. Among other functions, PLK1 phosphorylates BUBR1 at several residues including the tension-sensitive T680<sup>14</sup> and S676<sup>15</sup> in prometaphase allowing the formation of stable kinetochore-microtubule attachments. This activity needs to be tightly regulated to ensure the proper alignment of the chromosomes at the metaphase plate<sup>15-17</sup>.

PLK1 is recruited to specific targets via its Polo-box domain (PBD)<sup>18</sup>. PBD interacts with phosphosites characterized by the consensus motif S-[pS/pT]-P/X<sup>19</sup>. These phosphosites are provided by a priming phosphorylation event, usually mediated by CDK1 or other proline-directed kinases<sup>13</sup>; there is also evidence that PLK1 itself might create docking sites during cytokinesis<sup>20,21</sup>.

Several BRCA2 sites corresponding to PLK1 consensus motifs have been identified as phosphorylated in mitosis, some of which belong to a cluster of predicted phosphosites located in BRCA2 N-terminus around residue S193<sup>10</sup>. We set out to investigate which of these sites are phosphorylated by PLK1, and to reveal whether these phosphorylation events play a role in the regulation of mitotic progression.

Here, we demonstrate that T207 is a *bona fide* docking site for PLK1. By investigating the phenotype of BRCA2 missense variants that limit the phosphorylation of T207 by PLK1 we reveal an unexpected role for BRCA2 in the alignment of chromosomes at the metaphase plate. Furthermore, we provide evidence that this function is achieved by promoting the phosphorylation of the kinetochore tension-sensitive sites of BUBR1 by PLK1.

## Results

### **BRCA2 variants identified in breast cancer reduce the PLK1-dependent phosphorylation of BRCA2 N-terminal region**

Several missense variants of uncertain significance (VUS) identified in *BRCA2* in breast cancer patients are located in the region predicted to be phosphorylated by PLK1 (around S193) (Breast information core (BIC)<sup>22</sup> and BRCAshare<sup>23</sup>). To find out if any of these variants affected PLK1 phosphorylation in this region, we used an *in vitro* kinase assay to assess the phosphorylation by PLK1 of HEK293T-purified BRCA2<sub>1-250</sub> fragments containing each VUS M192T, S196N, T200K, S206C and T207A, or the mutant S193A, previously described as reducing phosphorylation of BRCA2 by PLK1<sup>10</sup>, and compared it to the WT protein (Figure 1a, b). As reported before, S193A reduced phosphorylation of BRCA2<sub>1-250</sub> by PLK1 (Figures 1a, 1b). Interestingly, variants T207A, S206C and T200K led to a 2-fold decrease in PLK1 phosphorylation of BRCA2<sub>1-250</sub> (Figure 1a, 1b). In contrast, M192T slightly increased the phosphorylation above WT levels whereas VUS S196N did not significantly modify the phosphorylation of BRCA2<sub>1-250</sub> by PLK1 (Figure 1a, b). Together, these results show that VUS T207A, S206C and T200K identified in breast cancer patients impair phosphorylation of BRCA2<sub>1-250</sub> by PLK1 *in vitro*.



## **BRCA2<sub>T207</sub> is a target of phosphorylation by PLK1**

The reduction of BRCA2 phosphorylation in BRCA2<sub>1-250</sub>T207A and S206C suggested that T207 could be a target of PLK1 phosphorylation. We investigated this possibility by following the phosphorylation kinetics of a truncated fragment of BRCA2 N-terminus comprising T207 (amino acids 190-283) (hereafter BRCA2<sub>190-283</sub>). We used Nuclear Magnetic Resonance (NMR) spectroscopy to monitor BRCA2<sub>190-283</sub> phosphorylation by recombinant PLK1 *in vitro*. NMR analysis allows residue-specific quantification of a peptide modification, provided it is <sup>15</sup>N-labelled. Figure 2a shows superimposed <sup>1</sup>H-<sup>15</sup>N HSQC spectra of BRCA2<sub>190-283</sub> at different time points of the phosphorylation reaction by PLK1. Analysis of these experiments revealed phosphorylation of S193 and of eight other phosphosites, among which three threonines and five serines (Figure 2a). Four residues (T226>T207>T219>S193, Figure 2b, S1a) were favoured phosphorylation sites, modified with markedly faster rates than the five other sites (S197, S217, S231, S239, S273). Interestingly, while T219 and T226 conservation is poor, T207 and S193 are conserved from mammals to fishes (Figures S1b and S1c) suggesting that both are important for BRCA2 function.

The phosphorylation of T207 together with the presence of a serine residue at position 206 creates a predicted docking site for PLK1<sub>PBD</sub><sup>19</sup>. Hence, we conclude that T207 phosphorylation by PLK1 is efficient in the context of BRCA2<sub>190-283</sub>, and it may be a primary event for further BRCA2 phosphorylation via the recruitment of PLK1 to BRCA2.

## **BRCA2 variants T207A and T200K alter the phosphorylation kinetics of PLK1**

Having identified T207 as a target of phosphorylation of PLK1, we next assessed the phosphorylation kinetics of T207 in the WT BRCA2<sub>190-283</sub> fragment and in the fragment containing the variants T207A or T200K that displayed reduced phosphorylation (Figure 1b, c). Time-resolved NMR experiments revealed that PLK1 phosphorylates significantly less BRCA2<sub>190-283</sub> containing the variant T207A than the WT peptide (Figure 3a, 3b). Initial phosphorylation rates were decreased by a factor 5 (S193), 8 (T226) and 13 (T219) (Figure 3b, S2a). Variant T200K reduced by half the phosphorylation rates of S193, T207, T219 and T226 (Figures 3c, 3d and S2b). In agreement with the *in vitro* kinase assay using the BRCA2<sub>1-250</sub> fragment purified from human cells (Figure 1), these results show that in BRCA2<sub>190-283</sub>, variants T207A and T200K identified in breast cancer patients impair the phosphorylation of T207 and the cascade of associated phosphorylation events.

### **VUS T207A, S206C and T200K reduce the interaction of BRCA2 and PLK1**

The finding that T207 is efficiently phosphorylated by PLK1 in BRCA2<sub>190-283</sub> polypeptide (Figure 2a) together with the observation that T207A mutation causes a global decrease in the phosphorylation of this region (Figure 3a) and the prediction that T207 is a docking site for PLK1<sub>PBD</sub> binding<sup>19</sup> made us hypothesize that T207 might be a “self-priming” phosphorylation event required for the interaction of PLK1 with BRCA2 at this site. The variants that reduce phosphorylation of T207 by PLK1 would then be predicted to alter PLK1<sub>PBD</sub> binding. To test this hypothesis, we examined the interaction of PLK1 with the VUS containing polypeptides. Using an amylose pull-down, we overexpressed 2xMBP-BRCA2<sub>1-250</sub> constructs carrying these variants in U2OS cells and detected the bound endogenous PLK1 by western blotting. As expected, overexpressed BRCA2<sub>1-250</sub> was able to interact with

endogenous PLK1 from mitotic cells but not from asynchronous cells (Figure 4a, lane 2 compared to lane 1). As previously described,<sup>10</sup> mutation S193A reduced the binding to PLK1 (Figure 4a, lane 6 compared to lane 2). Interestingly, the variants reducing PLK1 phosphorylation (T207A, S206C and T200K) showed a weaker interaction with PLK1 than the WT protein (Figure 4a pull-down lane 4, 8 compared to lane 2 and lane 20 compared to lane 18) despite the protein levels of PLK1 being unchanged (Figure 4a, compare PLK1 input lanes 2, 4, 6, 8, 18, 20); in contrast, M192T and S196N did not affect the binding (Figure 4a, pull-down lane 12, 14 compared to lane 10). These results are consistent with the idea of a self-priming phosphorylation by PLK1 on T207.

### **T207 is a *bona fide* docking site for PLK1**

To directly prove the recognition of pT207 by PLK1, we measured the affinity of recombinant PLK1<sub>PBD</sub> for a synthetic 17 aa peptide comprising phosphorylated T207. Using isothermal titration calorimetry (ITC), we found that recombinant PLK1<sub>PBD</sub> bound to the T207 phosphorylated peptide with an affinity of  $K_d = 0.09 \pm 0.07 \mu\text{M}$  (Figure 4b), similar to the optimal affinity reported for an interaction between PLK1<sub>PBD</sub> and its phosphorylated target<sup>19</sup>. Consistently, PLK1<sub>PBD</sub> bound to the fragment BRCA2<sub>190-283</sub> with a micromolar affinity upon phosphorylation by PLK1 ( $K_d = 0.14 \pm 0.02 \mu\text{M}$ ; Figure S3a) whereas it did not bind to the corresponding non-phosphorylated polypeptides (Figure 4c, Figure S3b). In agreement with the pull-down experiments, a peptide comprising mutated T207A abolished the interaction (Figure 4d). Importantly, a peptide comprising pT207 and S206C mutation could not bind to PLK1<sub>PBD</sub> (Figure 4e), as predicted from the consensus sequence requirement for PLK1<sub>PBD</sub> interaction<sup>19</sup>. Last, a peptide

containing phosphorylated S197, which is also a predicted docking site for PLK1, bound with much less affinity to PLK1<sub>PBD</sub> than pT207 ( $K_d = 17 \pm 2 \mu\text{M}$ ; Figure S3c).

Taken together, these results indicate that phosphorylation of T207 by PLK1 promotes the interaction of PLK1 with BRCA2 through a *bona fide* docking site for PLK1 and favours a cascade of phosphorylation events. In variants T200K and T207A the decrease in T207 phosphorylation impairs PLK1 docking at T207 explaining the reduction of binding to PLK1 and the global loss of phosphorylation by PLK1. S206C eliminates the serine residue at -1 required for PLK1<sub>PBD</sub> interaction resulting as well in a reduction of BRCA2 binding.

### **Impairing T207 phosphorylation delays mitosis**

PLK1 is a master regulator of mitosis<sup>13</sup>. To find out whether the interaction between BRCA2 and PLK1 is involved in the control of mitotic progression we examined the functional impact of two of the variants that reduce PLK1 phosphorylation at T207 (S206C and T207A) in the context of the full-length BRCA2 protein in cells. For this purpose, we generated stable clones expressing the cDNA coding of either the WT or the variants full-length BRCA2 to complement the knock out *BRCA2* cell line DLD1<sup>-/-24</sup>. We selected two clones for each variant showing similar protein levels as the WT clone (Figure S4a).

To examine the impact of these variants on mitosis, we monitored by time-lapse microscopy the time that double-thymidine-synchronized individual cells from each clone spent in mitosis, from mitotic entry to daughter cell separation. DLD1<sup>+/+</sup> and the WT clone showed similar kinetics, the majority of the cells (67% for DLD1<sup>+/+</sup> and 83% for the WT clone) having completed mitosis within 60 min (Figure 5a, 5b). In contrast, cells expressing variants S206C and T207A augmented the time spent in mitosis as

manifested by a significant decrease in the frequency of cells dividing within 60 min (~50%), similar to the BRCA2 deficient cells (DLD<sup>-/-</sup>) (Figures 5a and 5b). In addition to a slower mitotic progression, S206C and T207A showed higher frequency of mitotic failure than WT (14-23% compared to ~4% for the WT clone) (Figure 5a, failure).

As depletion of BRCA2 has been shown to impair SAC activity<sup>5</sup>, we next assessed the SAC activity by measuring the percentage of cells arrested in mitosis after treatment with the spindle poison nocodazole (Figure 5c), using phosphorylated (S10) histone 3 (pH3) as a mitotic marker<sup>25</sup>. As expected, upon nocodazole treatment, the percentage of pH3 positive WT cells increased compared to non-treated cells, this increase was similar to the one observed in cells expressing endogenous BRCA2 (DLD<sup>+/+</sup>) whereas in BRCA2 deficient cells (DLD<sup>-/-</sup>) the percentage was significantly lower (Figure 5c). Interestingly, the stable cell lines expressing variants S206C and T207A showed a significant decrease in the percentage of mitotic cells after nocodazole treatment in comparison to the WT cells, indicating a weakened SAC activity under mitotic-arrested conditions (Figure 5c). Consistently, a smaller percentage of G2/M cells was observed in S206C and T207A clones compared to the WT clone upon mitotic arrest induction (Figure S4b). The reduced number of cells in G2/M was not due to a defective cell cycle profile as the distribution of these cells in non-induced conditions was equivalent to that of the WT cells (Figure S4c).

Taken together, cells expressing S206C and T207A display slower mitotic progression and higher frequency of mitotic failure compared to WT cells. In

response to microtubule poison, VUS S206C and T207A compromise SAC activity, which results in a weakened ability to induce mitotic arrest.

### **Docking of PLK1 at T207 of BRCA2 promotes phosphorylation of BUBR1 at T680 and S676 by PLK1**

BRCA2 interacts directly with BUBR1<sup>4,5</sup>. BUBR1 associates with and is phosphorylated by PLK1, which controls the stability of kinetochore-microtubule interactions and enables the alignment of chromosomes at the metaphase plate<sup>14,15</sup>. The defective mitotic progression observed in the clones expressing S206C and T207A (Figure 5a, b) led us to investigate BUBR1 levels in these cell lines. As previously described<sup>15,26</sup>, upon cell arrest in G2/M phase, BUBR1 displayed 2 bands, the up-shifted band corresponding to phosphorylated BUBR1 (Figure 6a). Interestingly, the up-shifted band of BUBR1 strongly decreased in the cells expressing variants S206C or T207A compared to the cells expressing WT BRCA2 (Figure 6a). To find out the species of BUBR1 altered in the clones, we probed the same membrane with an antibody specific for pT680, a known BUBR1 target phosphosite for PLK1<sup>14</sup>. Interestingly, both clones of the cells expressing variants S206C and T207A displayed reduced pT680 levels of BUBR1 (Figure 6a). As previously described<sup>14</sup>, the phosphorylation of T680 is mediated by PLK1 since PLK1 inhibitors strongly reduced this signal (Figure S5a) and phosphatase treatment resulted in a decrease of the intensity of the band (Figure S5b). Furthermore, we observed a reduction in the PLK1-dependent phosphorylation of S676, another known target site of PLK1 in BUBR1<sup>15</sup> (Figure 6b), suggesting that BUBR1 phosphorylation by PLK1 is impaired in these cells. The reduction of BUBR1 phosphorylation in the S206C and T207A expressing cells was not due to a reduced

binding of PLK1 to BUBR1 since the same amount of PLK1 was co-immunoprecipitated with BUBR1 from S206C and T207A cells as from WT cells (Figure S5c). In contrast, cells expressing BRCA2 variants S206A and T207A showed a strong reduction of PLK1 interaction as detected by GFP-trap pull-down of BRCA2 (Figure 6c, 6d) confirming our results with the overexpressed BRCA2<sub>1-250</sub> fragments (Figure 4a).

Finally, as BRCA2 is known to bind BUBR1<sup>5</sup>, we also tested whether BRCA2 variants affected this interaction; however, although the binding to BUBR1 was generally reduced in S206C and T207A expressing cells, when normalizing for the input levels of BUBR1 the effect was not significant (Figure 6d).

Together, our results show that the phosphorylation of BUBR1 by PLK1 is impaired in cells expressing the variants of BRCA2 that cannot recruit PLK1 at T207.

### **The BRCA2 variants that reduce PLK1 phosphorylation display strong defects in chromosome alignment and chromosome segregation**

The phosphorylation of BUBR1 at T680 and S676 by PLK1 has been implicated in the formation of stable kinetochore-microtubules attachments<sup>14,15</sup>, a defect of which results in chromosome misalignment. Therefore, we next examined whether cells expressing the BRCA2 variants S206C and T207A that showed reduced levels of pT680 and pS676-BUBR1 altered chromosome alignment.

Following thymidine synchronization, the cells were blocked in prometaphase with Monastrol and then treated with proteasome inhibitor MG132 for 1h to avoid exit from mitosis. Chromosome alignment was subsequently analysed by immunofluorescence.

Strikingly, analysis of metaphase cells expressing S206C and T207A variants showed high frequency of chromosome misalignment compared to the WT BRCA2 clone (52% in S206C A9, 42.4% in T207 B1 versus 15.8% in the WT clone) (Figure 6e, f) as detected by a signal of the centromere marker (CREST) outside the metaphase plate (Figure 6f). Interestingly, most of the misaligned chromosomes were located close to the spindle pole revealed by staining with the microtubule marker alpha-tubulin (Figure 6e, 6f).

Unresolved chromosome misalignment can lead to chromosome missegregation. To find out if this was the case in cells expressing S206C and T207A variants we next examined these cells at anaphase/telophase upon nocodazole-induced mitotic arrest. As quantified in Figure 7a and illustrated in Figure 7b, 65% of cells expressing S206C and 50% of T207A variants displayed chromosome segregation errors including lagging chromosomes and chromatin bridges compared to 29% in the WT expressing cells.

Together, these results indicate that precluding the docking of PLK1 at T207 in BRCA2 is enough to impair BUBR1 phosphorylation by the same kinase. The outcome is the one expected for BUBR1 phosphorylation impairment<sup>15,17</sup> i.e., chromosome misalignment and missegregation.

### **The BRCA2 variants altering PLK1 phosphorylation restore the hypersensitivity of BRCA2 deficient cells to DNA damage**

Since BRCA2 has a major role in DNA repair by homologous recombination (HR), the delayed mitosis observed in the VUS clones could result from checkpoint activation through unrepaired DNA. To rule out this possibility, we performed a clonogenic survival assay in the stable clones treated with mitomycin C (MMC), an



inter-strand crosslinking agent to which BRCA2 deficient cells are highly sensitive<sup>27</sup>. As expected, the DLD1<sup>-/-</sup> cells showed hypersensitivity to the treatment whereas the WT clone complemented this phenotype almost to the same survival levels as the DLD1<sup>+/+</sup> cells carrying the endogenous BRCA2, validating our cell system. The stable clones expressing VUS S206C and T207A also complemented the hypersensitive phenotype of BRCA2 deficient cells (DLD1<sup>-/-</sup>) reaching similar levels as the WT clone (Figure 7c) suggesting that the delay in mitosis is not a consequence of checkpoint activation via unrepaired DNA. In contrast, clones expressing VUS S206C and T207A did show a growth defect manifested in a reduced number of colonies observed in unchallenged cells (Figure 7d), which is consistent with the mitotic delay observed in the video-microscopy experiment (Figure 5a, 5b). Moreover, the interaction of BRCA2<sub>1-250</sub> and PLK1 in mitotic arrested cells was not affected by IR treatment (Figure 7e), consistent with previous work<sup>28</sup>.

In summary, these results strongly suggest that the interaction of BRCA2 and PLK1 in mitosis is independent of the HR function of BRCA2.

## Discussion

Our results demonstrate that residues S193 and T207 of BRCA2 can be phosphorylated by PLK1 (Figure 2) and that pT207 constitutes a *bona fide* docking site for PLK1<sub>PBD</sub> (Figure 4b). Accordingly, BRCA2 missense variants of unknown clinical significance reducing the phosphorylation status of T207 (T207A, S206C, T200K), result in a decrease in the interaction of BRCA2-PLK1 (Figure 4). The phenotype of cells expressing two of these variants (S206C, T207A) in the context of the full-length protein in BRCA2 deficient background, allowed us to investigate in detail the role of BRCA2 phosphorylation by PLK1 in mitosis that was until now

unclear. We found that the BRCA2 missense variants precluding the docking of PLK1 at T207 results in severe chromosome misalignments (Figure 6c, d). Remarkably, variants S206C and T207A of BRCA2 lead to a frequency of chromosome misalignment equivalent to the one reported for BUBR1 mutated in the three phosphorylation targets sites of PLK1, BUBR1 3A mutant<sup>14</sup>.

Mechanistically, cells expressing T207A and S206C exhibit reduced PLK1-dependent BUBR1 phosphorylation at two known tension-sensitive phosphosites required for the establishment of kinetochore-microtubule attachments, S676 and T680 (Figure 6a, b)<sup>14,15</sup>. Importantly, these results strongly suggest that the recruitment of PLK1 at pT207 docking site in BRCA2 is required for the phosphorylation of BUBR1 by PLK1.

The consequences of the increased chromosome misalignments are mitotic delay, weaken SAC activity upon induced mitotic arrest, chromosome missegregation and increased cytokinetic failure (Figure 5, 7a, b).

Finally, the activity of BRCA2-PLK1 interaction in mitotic progression is independent of the HR function of BRCA2 as cells expressing these VUS display normal sensitivity to DNA damage (Figure 7c).

Putting our results together we propose the following model (Figure 7f): In BRCA2 WT cells, PLK1 phosphorylates BRCA2 on T207 leading to the docking of PLK1 at this site. This step promotes the phosphorylation of BUBR1 at the tension-sensitive phosphosites (T680 and S676) by PLK1 in prometaphase. Once the kinetochore-microtubules attachments are established and proper tension is achieved, BUBR1 is no longer phosphorylated by PLK1<sup>15</sup>. This leads to a full alignment of chromosomes at the metaphase plate (Figure 7f, panel 2) and the subsequent faithful chromosome

segregation in anaphase (Figure 7f, panel 3).

In cells expressing the variants that fail to be phosphorylated at T207 (T200K, S206C, T207A) PLK1 cannot be recruited to pT207, impairing the phosphorylation of BUBR1 by the same kinase, thus leading to misalignment defects that prolong mitosis (Figure 7f, panel 2'). This may also unbalance the pool of BUBR1 required for SAC activation as cells carrying these variants display weakened SAC response only upon treatment with microtubule poison (Figure 5c); as a consequence, these cells exhibit increased chromosome segregation errors (Figure 7f, panel 3') and mitotic failure. The phenotype we observe in these clones fits very well with the presence of two pools of BUBR1 as recently described<sup>17</sup>, one that is important for chromosome alignment onto the metaphase plate, and another that activates the SAC.

Our results are consistent with the “processive phosphorylation” model (as opposed to the “distributive phosphorylation” model) proposed before on how PLK1<sub>PBD</sub> regulates the kinase activity of PLK1<sup>29</sup>, with some modifications. In this model, PLK1<sub>PBD</sub> would bind first the site phosphorylated by another mitotic kinase and then the kinase domain of PLK1 would be positioned to phosphorylate the same protein at another site. In this work, we show that the mitotic kinase would be PLK1 itself (“self-priming”<sup>21</sup>), and the kinase domain of PLK1 would phosphorylate not the same protein but BUBR1 presumably bound to BRCA2. This model is also consistent with the fact that BRCA2 localization to the kinetochore is dependent on PLK1 activity as recently shown<sup>6</sup>, discarding that BRCA2 recruits PLK1 to the kinetochore (distributive phosphorylation model<sup>29</sup>). Interestingly, the consensus sequence of PLK1 phosphorylation imposes an aspartic or glutamic acid at the -1 position instead of a serine (S206)<sup>30</sup>. Thus, this work extends the consensus sequence of PLK1 phosphorylation.

In all, we reveal a PLK1 self-priming docking site at BRCA2 pT207 that favours BUBR1 phosphorylation by the same kinase facilitating full chromosome alignment.

BRCA2 also supports the acetylation/deacetylation of BUBR1 which appears to be necessary for SAC activation and silencing<sup>5,6</sup>; how these BUBR1 acetylation/deacetylation and phosphorylation events are coordinated in mitosis is still unclear. Moreover, BRCA2 harbours another docking site for PLK1 at T77, a site that is primed by CDK phosphorylation<sup>28</sup>. In addition to T207, we have observed other phosphorylation events including S193 (Figure 2), required for the midbody localization of BRCA2<sup>9</sup>, and there are other PLK1-phosphorylation sites described in the central region of the protein<sup>11</sup>. What is the chronology of phosphorylation events throughout the cell cycle and how they are regulated deserves further study.

The fact that *BRCA2* missense variants identified in breast cancer patients affect BRCA2 phosphorylation by PLK1 with direct consequences in chromosome alignment and segregation suggests that this function could be associated with the aneuploidy observed in *BRCA2*-deficient tumors.

### **Author Contributions**

A.E. purified WT and mutated BRCA2<sub>1-250</sub>, established the stable DLD1<sup>-/-</sup> cell lines, performed kinase assays, pull-down assays, western blots, time-lapse microscopy experiments, mitotic index measurements by FACS and clonogenic survival assays as well as the statistical analysis for these experiments. M.J. performed the NMR experiments assisted by S. M., F.T. and S.Z.J.; S.M. performed the ITC experiments and purified PLK1<sub>PBD</sub>; C.M. performed IF and image acquisition of metaphase plate alignment and chromosome segregation; V.B. assisted establishing stable clones

and performing clonogenic survival assays; A.M. cloned and produced PLK1 from insect cells; A.C., A.E. and S.Z.J. designed the experiments; A.C. and S.Z.J. supervised the work; A.C. wrote the paper with important contributions from all authors.

## Acknowledgments

We thank members of the AC lab for fruitful comments on the manuscript and Juan S. Martinez for construct BRCA2<sub>1-250</sub>. We thank Eric Nigg for pS676-BUBR1 antibody. We acknowledge the Cell and Tissue Imaging Facility of the Institut Curie (PICT), a member of the France BioImaging National Infrastructure (ANR-10-INBS-04) and the French Infrastructure for Integrated Structural Biology (<https://www.structuralbiology.eu/networks/frisbi>, (ANR-10-INSB-05-01).

This work was supported by the ATIP-AVENIR CNRS/INSERM Young Investigator grant 201201, EC-Marie Curie Career Integration grant CIG293444 to A.C. and Institut National du Cancer INCa-DGOS\_8706 to A.C. and S.Z.J.; A.E. was supported by the Swedish Society for Medical Research.

The authors declare no conflict of interest.

Correspondence and requests for materials should be addressed to A.C.

## References

1. Moynahan, M. E., Pierce, A. J. & Jasin, M. BRCA2 is required for homology-directed repair of chromosomal breaks. *Molecular Cell* **7**, 263–272 (2001).
2. Jensen, R. B., Carreira, A. & Kowalczykowski, S. C. Purified human BRCA2 stimulates RAD51-mediated recombination. *Nature* **467**, 678–683 (2010).
3. Saleh-Gohari, N. & Helleday, T. Conservative homologous recombination preferentially repairs DNA double-strand breaks in the S phase of the cell cycle in human cells. *Nucleic Acids Research* **32**, 3683–3688 (2004).
4. Futamura, M. *et al.* Potential role of BRCA2 in a mitotic checkpoint after phosphorylation by hBUBR1. *Cancer Res* **60**, 1531–1535 (2000).

5. Choi, E. *et al.* BRCA2 fine-tunes the spindle assembly checkpoint through reinforcement of BubR1 acetylation. *Developmental Cell* **22**, 295–308 (2012).
6. Park, I. *et al.* HDAC2/3 binding and deacetylation of BubR1 initiates spindle assembly checkpoint silencing. *FEBS J* (2017). doi:10.1111/febs.14286
7. Mondal, G. *et al.* BRCA2 localization to the midbody by filamin A regulates cep55 signaling and completion of cytokinesis. *Developmental Cell* **23**, 137–152 (2012).
8. Daniels, M. J., Wang, Y., Lee, M. & Venkitaraman, A. R. Abnormal cytokinesis in cells deficient in the breast cancer susceptibility protein BRCA2. *Science* **306**, 876–879 (2004).
9. Takaoka, M., Saito, H., Takenaka, K., Miki, Y. & Nakanishi, A. BRCA2 phosphorylated by PLK1 moves to the midbody to regulate cytokinesis mediated by nonmuscle myosin IIC. *Cancer Res* **74**, 1518–1528 (2014).
10. Lin, H.-R., Ting, N. S. Y., Qin, J. & Lee, W.-H. M phase-specific phosphorylation of BRCA2 by Polo-like kinase 1 correlates with the dissociation of the BRCA2-P/CAF complex. *J Biol Chem* **278**, 35979–35987 (2003).
11. Lee, M., Daniels, M. J. & Venkitaraman, A. R. Phosphorylation of BRCA2 by the Polo-like kinase Plk1 is regulated by DNA damage and mitotic progression. *Oncogene* **23**, 865–872 (2004).
12. Zitouni, S., Nabais, C., Jana, S. C., Guerrero, A. & Bettencourt-Dias, M. Polo-like kinases: structural variations lead to multiple functions. *Nat Rev Mol Cell Biol* **15**, 433–452 (2014).
13. Barr, F. A., Silljé, H. H. W. & Nigg, E. A. Polo-like kinases and the orchestration of cell division. *Nat Rev Mol Cell Biol* **5**, 429–440 (2004).
14. Suijkerbuijk, S. J. E., Vleugel, M., Teixeira, A. & Kops, G. J. P. L. Integration of kinase and phosphatase activities by BUBR1 ensures formation of stable kinetochore-microtubule attachments. *Developmental Cell* **23**, 745–755 (2012).
15. Elowe, S., Hümmel, S., Uldschmid, A., Li, X. & Nigg, E. A. Tension-sensitive Plk1 phosphorylation on BubR1 regulates the stability of kinetochore microtubule interactions. *Genes Dev* **21**, 2205–2219 (2007).
16. Elowe, S. *et al.* Uncoupling of the spindle-checkpoint and chromosome-congression functions of BubR1. *J Cell Sci* **123**, 84–94 (2010).
17. Zhang, G., Mendez, B. L., Sedgwick, G. G. & Nilsson, J. Two functionally distinct kinetochore pools of BubR1 ensure accurate chromosome segregation. *Nature Communications* **7**, 12256 (2016).
18. Elia, A. E. H., Cantley, L. C. & Yaffe, M. B. Proteomic screen finds pSer/pThr-binding domain localizing Plk1 to mitotic substrates. *Science* **299**, 1228–1231 (2003).
19. Elia, A. E. H. *et al.* The molecular basis for phosphodependent substrate targeting and regulation of Plks by the Polo-box domain. *Cell* **115**, 83–95 (2003).
20. Neef, R. *et al.* Phosphorylation of mitotic kinesin-like protein 2 by polo-like kinase 1 is required for cytokinesis. *J Cell Biol* **162**, 863–875 (2003).
21. Kang, Y. H. *et al.* Self-regulated Plk1 recruitment to kinetochores by the Plk1-PBIP1 interaction is critical for proper chromosome segregation. *Mol. Cell* **24**, 409–422 (2006).
22. Szabo, C., Masiello, A., Ryan, J. F. & Brody, L. C. The breast cancer information core: database design, structure, and scope. *Hum. Mutat.* **16**, 123–131 (2000).

23. Bérout, C. *et al.* BRCA Share: A Collection of Clinical BRCA Gene Variants. *Hum. Mutat.* **37**, 1318–1328 (2016).
24. Hucl, T. *et al.* A syngeneic variance library for functional annotation of human variation: application to BRCA2. *Cancer Res* **68**, 5023–5030 (2008).
25. Giet, R. & Glover, D. M. Drosophila Aurora B Kinase Is Required for Histone H3 Phosphorylation and Condensin Recruitment during Chromosome Condensation and to Organize the Central Spindle during Cytokinesis. *J Cell Biol* **152**, 669–682 (2001).
26. Huang, H. *et al.* Phosphorylation sites in BubR1 that regulate kinetochore attachment, tension, and mitotic exit. *The Journal of Cell Biology* **183**, 667–680 (2008).
27. Kraakman-van der Zwet, M. *et al.* Brca2 (XRCC11) deficiency results in radioresistant DNA synthesis and a higher frequency of spontaneous deletions. *Mol. Cell. Biol.* **22**, 669–679 (2002).
28. Yata, K. *et al.* BRCA2 coordinates the activities of cell-cycle kinases to promote genome stability. *CellReports* **7**, 1547–1559 (2014).
29. Yaffe, M. B. Structure and function of Polo-like kinases. *Oncogene* **24**, 248–259 (2005).
30. Identification of a consensus motif for Plk (Polo-like kinase) phosphorylation reveals Myt1 as a Plk1 substrate. *J Biol Chem* **278**, 25277–25280 (2003).

## Figure legends

### Figure 1. BRCA2 VUS alter PLK1 phosphorylation of BRCA2<sub>1-250</sub>

**(a)** PLK1 *in vitro* kinase assay with BRCA2<sub>1-250</sub>. Top: The polypeptides encompassing BRCA2<sub>1-250</sub> WT or S193A, M192T, S196N, T200K, S206C, T207A mutations were incubated with recombinant PLK1 in the presence of  $\gamma^{32}\text{P}$ -ATP. The samples were resolved on 7.5% SDS-PAGE and the  $^{32}\text{P}$ -labeled products were detected by autoradiography. Bottom: 7.5% SDS-PAGE showing the input of purified 2xMBP-BRCA2<sub>1-250</sub> WT and mutated proteins (0.5  $\mu\text{g}$ ) used in the reaction as indicated. **(b)** Quantification of the relative phosphorylation in (a). Data in (b) are represented as mean  $\pm$  SD from at least three independent experiments (WT (n=9), S193A (n=4), M192T (n=4), S196N (n=4), S206C (n=4), T200K (n=5), T207A (n=4)). One-way ANOVA test with Tukey's multiple comparisons test was used to calculate statistical significance of differences (the asterisks show differences compared to WT; ns (non-significant),  $p > 0.05$ , \*  $p \leq 0.05$ , \*\*  $p \leq 0.01$ , \*\*\*  $p \leq 0.001$ ).



## Figure 2. PLK1 phosphorylates T207 in BRCA2<sub>190-283</sub>

Phosphorylation kinetics of BRCA2<sub>190-283</sub> as observed by NMR. **(a)** Superposition of the <sup>1</sup>H-<sup>15</sup>N HSQC spectra recorded as a function of the phosphorylation time: from black (before phosphorylation) to red (after 24h with PLK1). PLK1 (1.1 μM) was incubated with <sup>15</sup>N labelled BRCA2<sub>190-283</sub> (200 μM) at 30°C and 200 μl were taken for each time point. Right panel: Zoom on the region containing the NMR signals of the phosphorylated residues. NMR peaks are labelled to indicate the corresponding residue following the timing colour code indicated in the left arrow (dark blue label: peaks appearing before 4 h; green label: peaks appearing before 5 h; red label: peaks observed only at 24 h). pT219 and pT226 give rise to several peaks (marked as (a), (b), (c)) as a function of the phosphorylation state of the surrounding residues. **(b)** Phosphorylation kinetics of S193 (red), T207 (black), T219 (blue) and T226 (grey). In the case of T226, the phosphorylation percentage corresponds to the sum of the intensities of peaks pT226(a), pT226(b) and pT226(c), which reflects the existence of different environments for phosphorylated T226 due to further phosphorylation of neighbouring T219 and S231. The multiplicity of the peaks corresponding to phosphorylated T226 at 24h hindered a proper measurement of this time point.

## Figure 3. BRCA2 VUS alter PLK1 phosphorylation of BRCA2<sub>190-283</sub>

**(a)** Superposition of the <sup>1</sup>H-<sup>15</sup>N HSQC spectra recorded on VUS T207A as a function of the phosphorylation time: from black (before phosphorylation) to red (after 24h incubation with PLK1). The conditions are the same as in Figure 2a. A zoom on the region containing the NMR signals of the phosphorylated residues is shown. **(b)**



Phosphorylation kinetics of T207 (black), S193 (red), T226 (grey) and T219 (blue), in WT (filled circles) versus T207A mutated BRCA2<sub>190-283</sub> (empty circles). **(c)** Superposition of the <sup>1</sup>H-<sup>15</sup>N HSQC spectra recorded on variant T200K as a function of the phosphorylation time. **(d)** Phosphorylation kinetics of T207 (black), S193 (red), T226 (grey) and T219 (blue), in WT (filled circles) versus T200K mutated BRCA2<sub>190-283</sub> (empty circles).

**Figure 4. BRCA2 variants showing reduced phosphorylation by PLK1 impair PLK1 binding**

**(a)** 2xMBP-BRCA2<sub>1-250</sub> expressing the WT, the VUS (M192T, S196N, T200K, S206C and T207A) or the mutant S193A were expressed in U2OS cells by transient transfection for 30h before the cells were treated with nocodazole for 14h. Mitotic cells were lysed and immunoprecipitation was performed against the MBP tag using amylose beads. Complexes were resolved on 4-15% SDS-PAGE followed by western blotting using anti-PLK1 and anti-MBP antibodies. **(b, c, d)** Isothermal Titration Calorimetry (ITC) thermograms showing binding of PLK1<sub>PBD</sub> to a 17 aa BRCA2 peptide containing **(b)** pT207, **(c)** T207, **(d)** A207, **(e)** C206pT207.

**Figure 5. BRCA2 variants S206C and T207A delay mitosis and alter SAC activity**

**(a)** Top: Scheme of the double thymidine block procedure used to synchronize DLD1<sup>-/-</sup> stable clones for live-cell imaging of cells progressing through mitosis. Bottom: Frequency distribution of the time cells spend in mitosis from anaphase onset to daughter cell separation monitored by time-lapse microscopy. (DLD1<sup>+/+</sup> (n=3), DLD1<sup>-/-</sup> (n=4), WT C1 (n=6), S206C A7 and A9 (n=3), T207A B1 and E4

(n=3)). **(b)** Representative still images of the live-cell imaging performed in Figure 5a at different time points. The time in each image indicates the min after mitotic onset. Scale bar represents 10  $\mu$ m. **(c)** SAC activity was measured by flow cytometry analysis of p-histone 3 expression in DLD1<sup>-/-</sup> stable clones after treatment with nocodazole for 14h (DLD1<sup>+/+</sup> (n=3), DLD1<sup>-/-</sup> (n=7), WT C1 (n=7), S206C A7 (n=6) and A9 (n=4), T207A B1 (n=5) and E4 (n=5).

Statistical significance of the difference in (a) and (b) was calculated with two-way ANOVA test with Tukey's multiple comparisons test (the asterisks show differences compared to WT; ns (non-significant),  $p > 0.05$ , \*  $p \leq 0.05$ , \*\*  $p \leq 0.01$ , \*\*\*  $p \leq 0.001$ , \*\*\*\*  $p \leq 0.0001$ ).

### **Figure 6. Cells expressing BRCA2 variants that alter PLK1 phosphorylation display reduced protein levels of phosphorylated BUBR1 and misaligned chromosomes**

**(a, b)** Western blots showing the expression levels of endogenous BUBR1 and (a) pT680-BUBR1 or (b) pS676-BUBR1 in nocodazole treated DLD1<sup>-/-</sup> stable clones expressing EGFPMBP-BRCA2 WT or VUS as indicated. **(c)** GFP-trap pull-down from whole cell lysates of mitotic DLD1<sup>-/-</sup> stable clones expressing WT BRCA2, VUS S206C and T207A. Immuno-complexes were resolved on 4-15% SDS-PAGE followed by western blotting using anti-BRCA2, -BUBR1 and -PLK1 antibodies. StainFree image of the gel before transfer is used as loading control (cropped image is shown). **(d)** Quantification of co-immunoprecipitated BUBR1 and PLK1 with EGFP-MBP-BRCA2 in each lane (c) relative to the protein levels in the input and to the amount of pulled-down EGFP-MBP-BRCA2. **(e)** Top: Scheme of the double thymidine block procedure used to synchronize DLD1<sup>-/-</sup> stable clones for analysis of

chromosome alignment. Bottom: Quantification of misaligned chromosomes outside the metaphase plate in BRCA2 WT versus S206C and T207 expressing DLD1<sup>-/-</sup> stable clones. **(f)** Representative images of the type of chromosome alignment observed in cells expressing BRCA2 WT, S206C and T207A variants quantified in (e), scale bar represents 10  $\mu$ m. Statistical significance of the difference in (e) was calculated with two-way ANOVA test with Tukey's multiple comparisons test (the asterisks show differences compared to WT; ns (non-significant),  $p > 0.05$ , \*  $p \leq 0.05$ , \*\*  $p \leq 0.01$ , \*\*\*  $p \leq 0.001$ , \*\*\*\*  $p \leq 0.0001$ ). *n* in (e) indicates the number of cells counted in each cell clone from a total of 2-3 independent experiments.

**Figure 7. BRCA2 VUS S206C and T207A show aberrant chromosome segregation but display normal sensitivity to MMC**

**(a)** Quantification of cells with aberrant chromosomes segregation in DLD1<sup>-/-</sup> stable BRCA2-WT, S206C and T207 clones. **(b)** Representative images of the type of aberrant chromosome segregation observed in the DLD1<sup>-/-</sup> stable clones expressing WT or VUS BRCA2 quantified in (a), CREST antibody is used as marker of centromere; nuclei are revealed with DAPI counterstaining. Scale bars represents 10  $\mu$ m. **(c)** Quantification of the surviving fraction of DLD1<sup>-/-</sup> stable clones assessed by clonogenic survival upon exposure to MMC at concentrations: 0, 0.5, 1.0 and 2.5  $\mu$ M. Data are represented as mean  $\pm$  SD: DLD1<sup>+/+</sup> (red) (n=3), DLD1<sup>-/-</sup> (gray) (n=5), WT C1 (black) (n=5), S206C A7 (blue) (n=2), T207A B1 (green) (n=4). **(d)** Crystal violet stained colonies of unchallenged cells from (c). **(e)** Co-immunoprecipitation of endogenous PLK1 after exposure to IR (6 Gy) in nocodazole treated U2OS cells expressing exogenous 2xMBP-BRCA2<sub>1-250</sub> (WT). StainFree image of the 7.5% SDS-

PAGE (7.5%) gel before transfer was used as loading control (cropped image is shown). **(f)** Model for the role of PLK1 phosphorylation of BRCA2 in mitosis (see text for details). In panels 2, 2', 3 and 3' blue blobs represent chromosomes, red cylinders represent the centrioles and orange lines represent the spindle microtubules.

Statistical significance of the difference in (a) was calculated with one-way ANOVA test with Tukey's multiple comparisons test (the asterisks show differences compared to WT; ns (non-significant),  $p > 0.05$ , \*  $p \leq 0.05$ , \*\*  $p \leq 0.01$ , \*\*\*  $p \leq 0.001$ , \*\*\*\*  $p \leq 0.0001$ ).  $n$  in (a) indicates the number of cells counted in each cell clone from a total of 2-4 independent experiments.

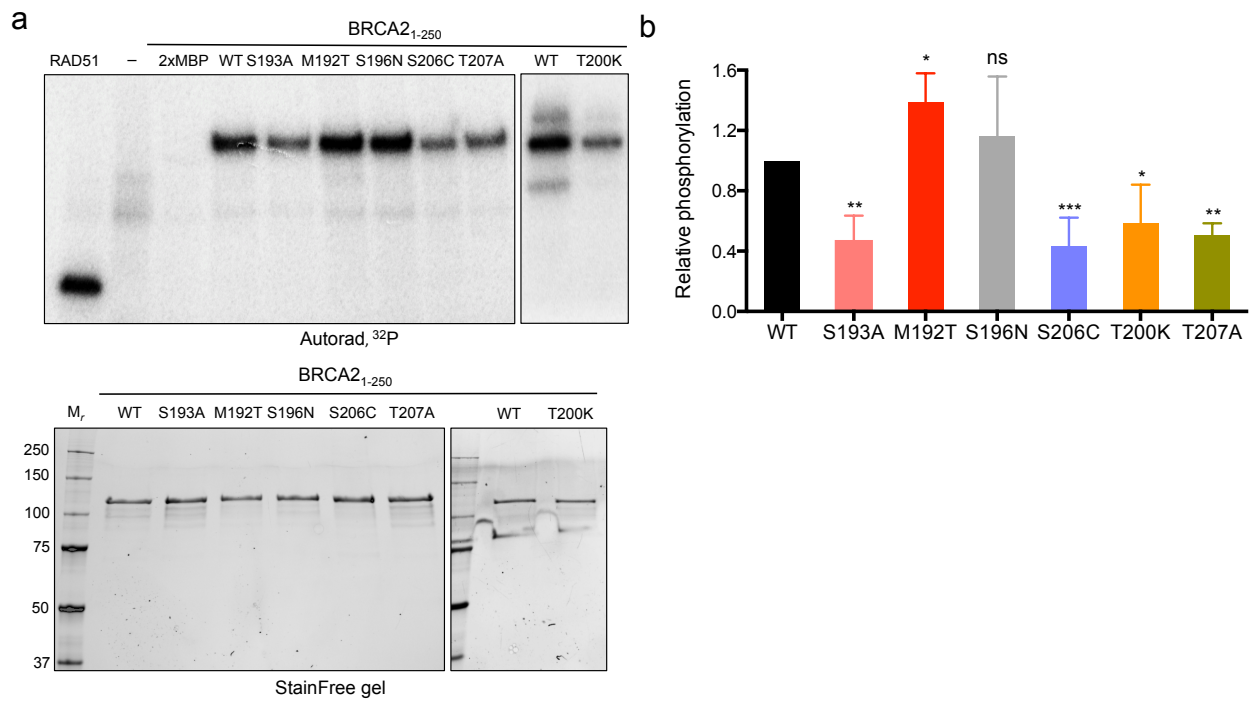

Figure 1

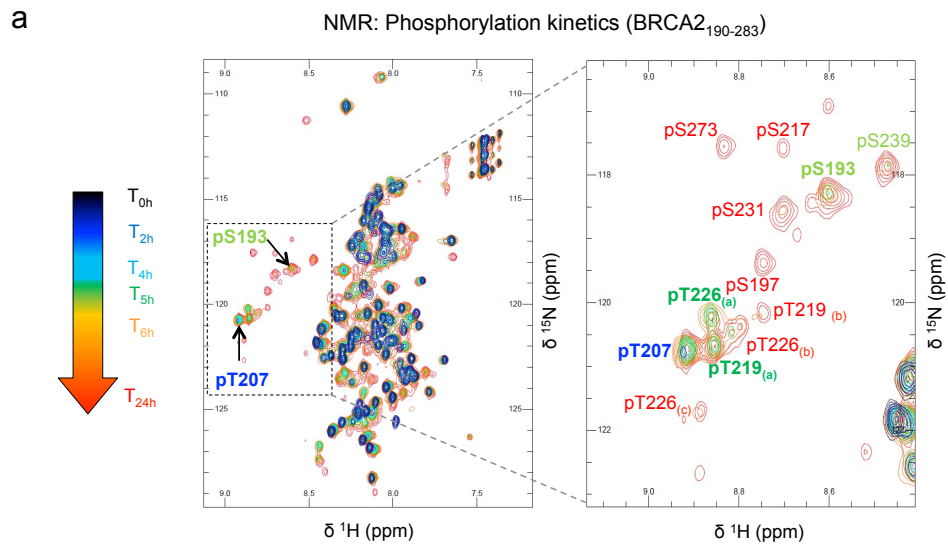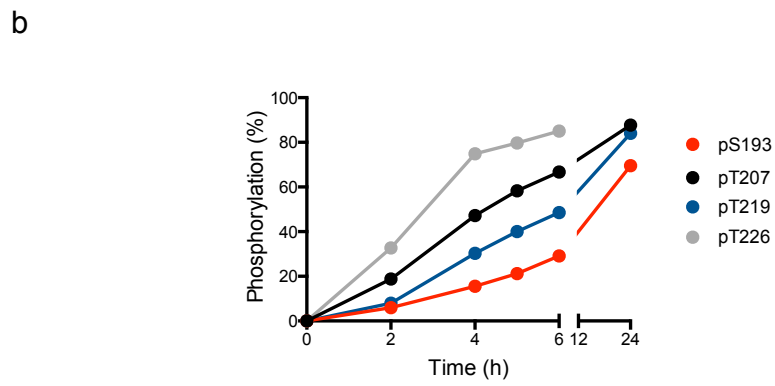

Figure 2

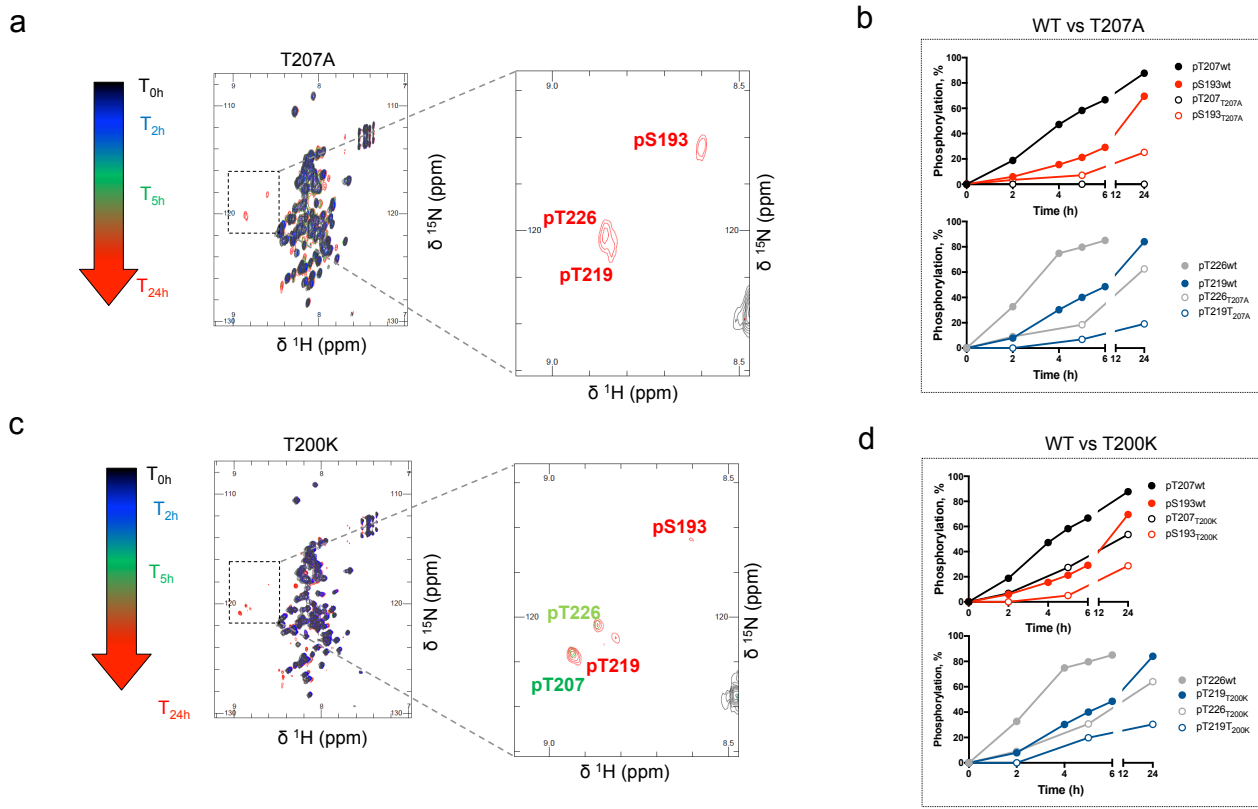

Figure 3

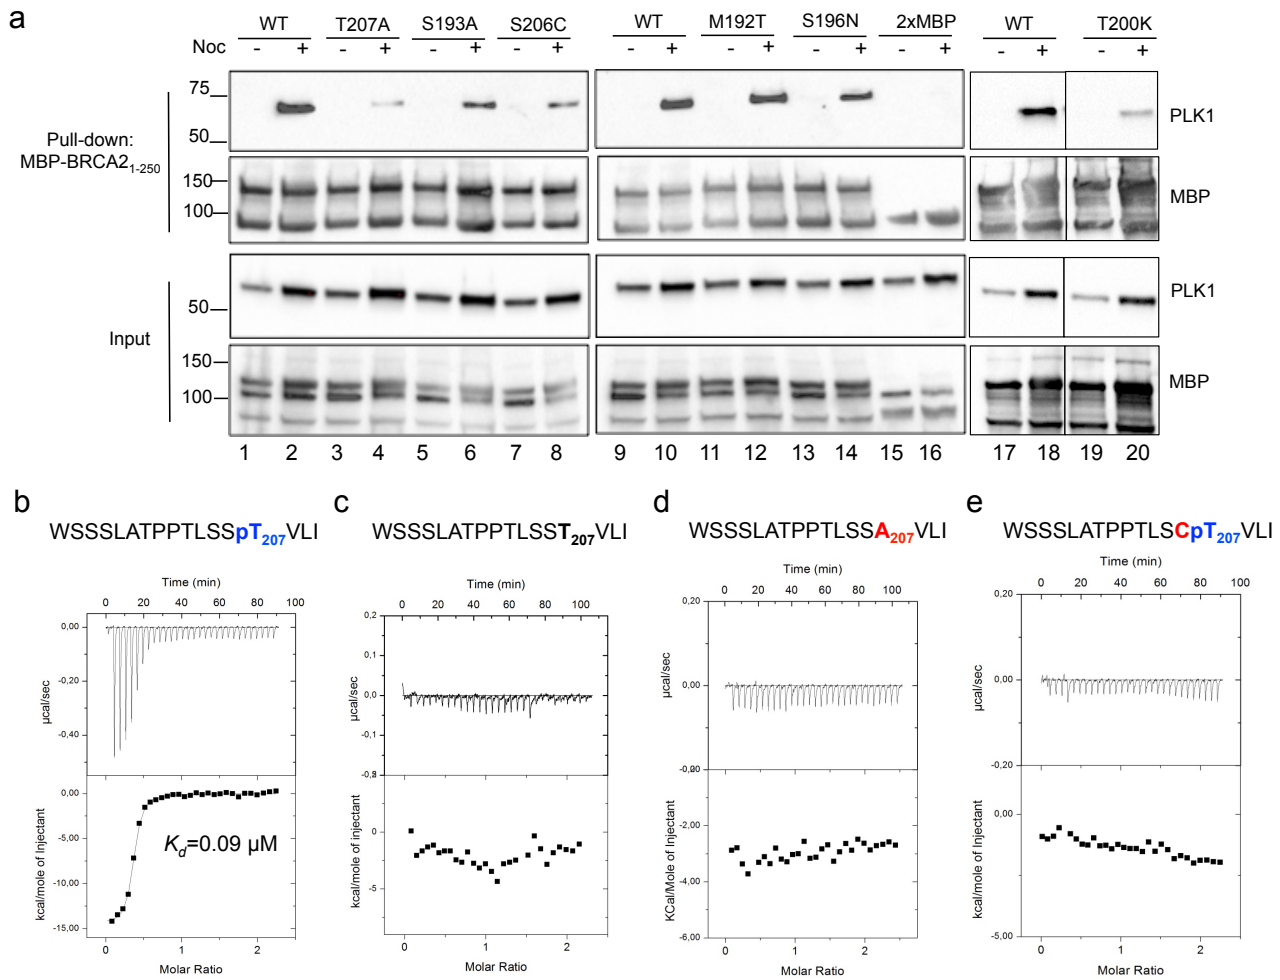

Figure 4



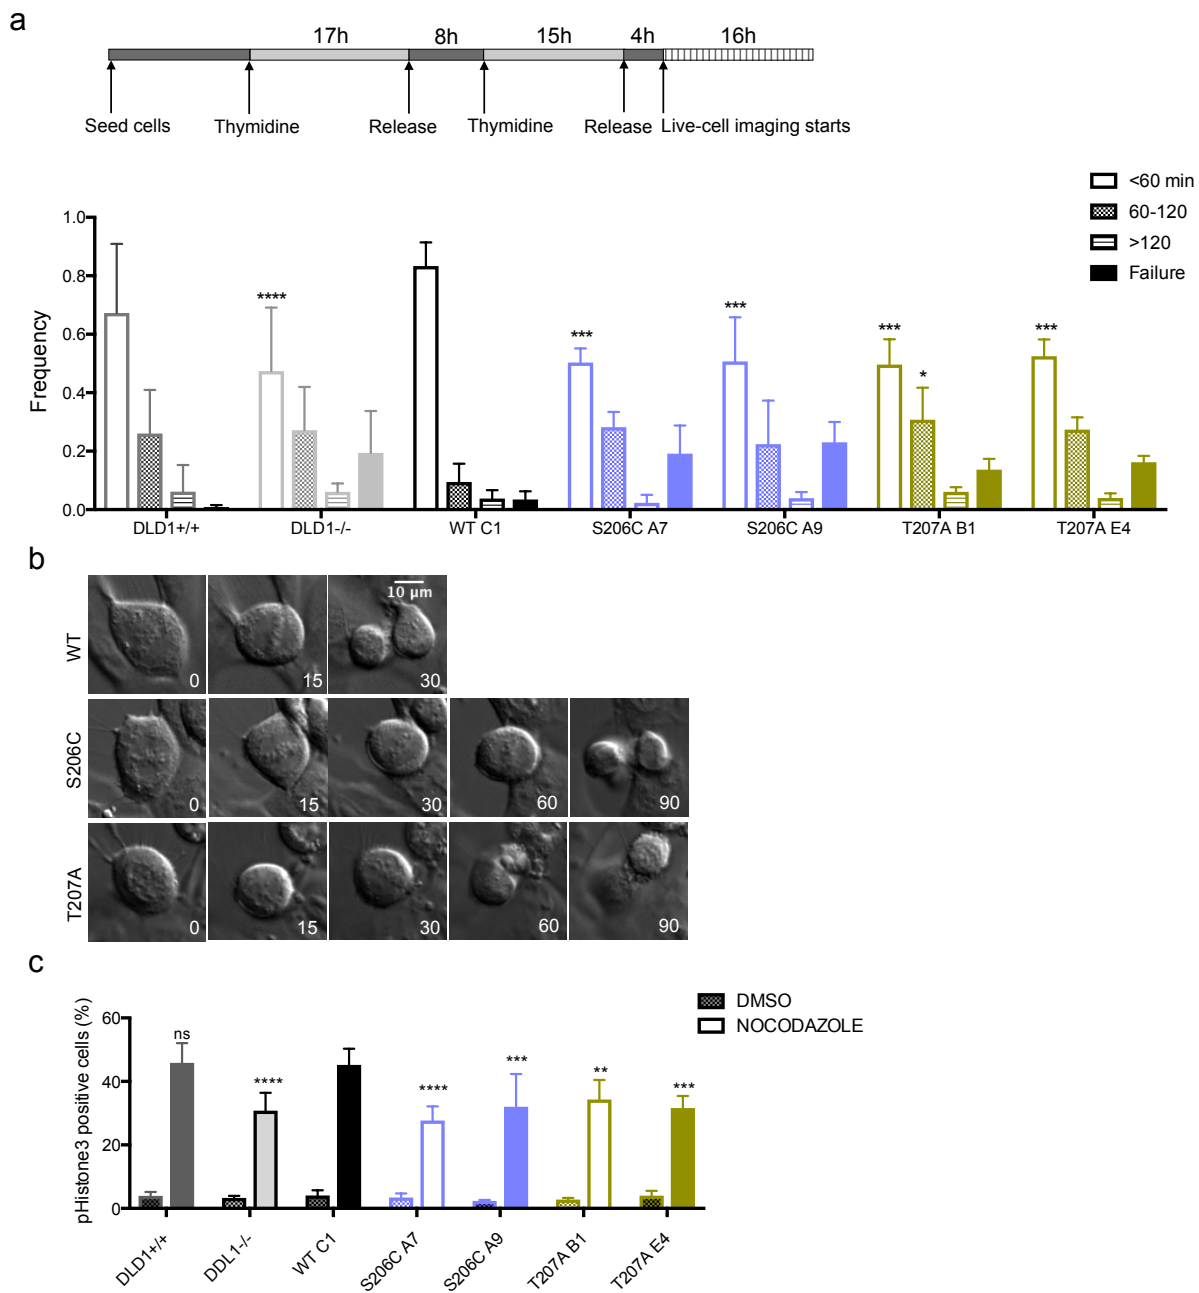

Figure 5

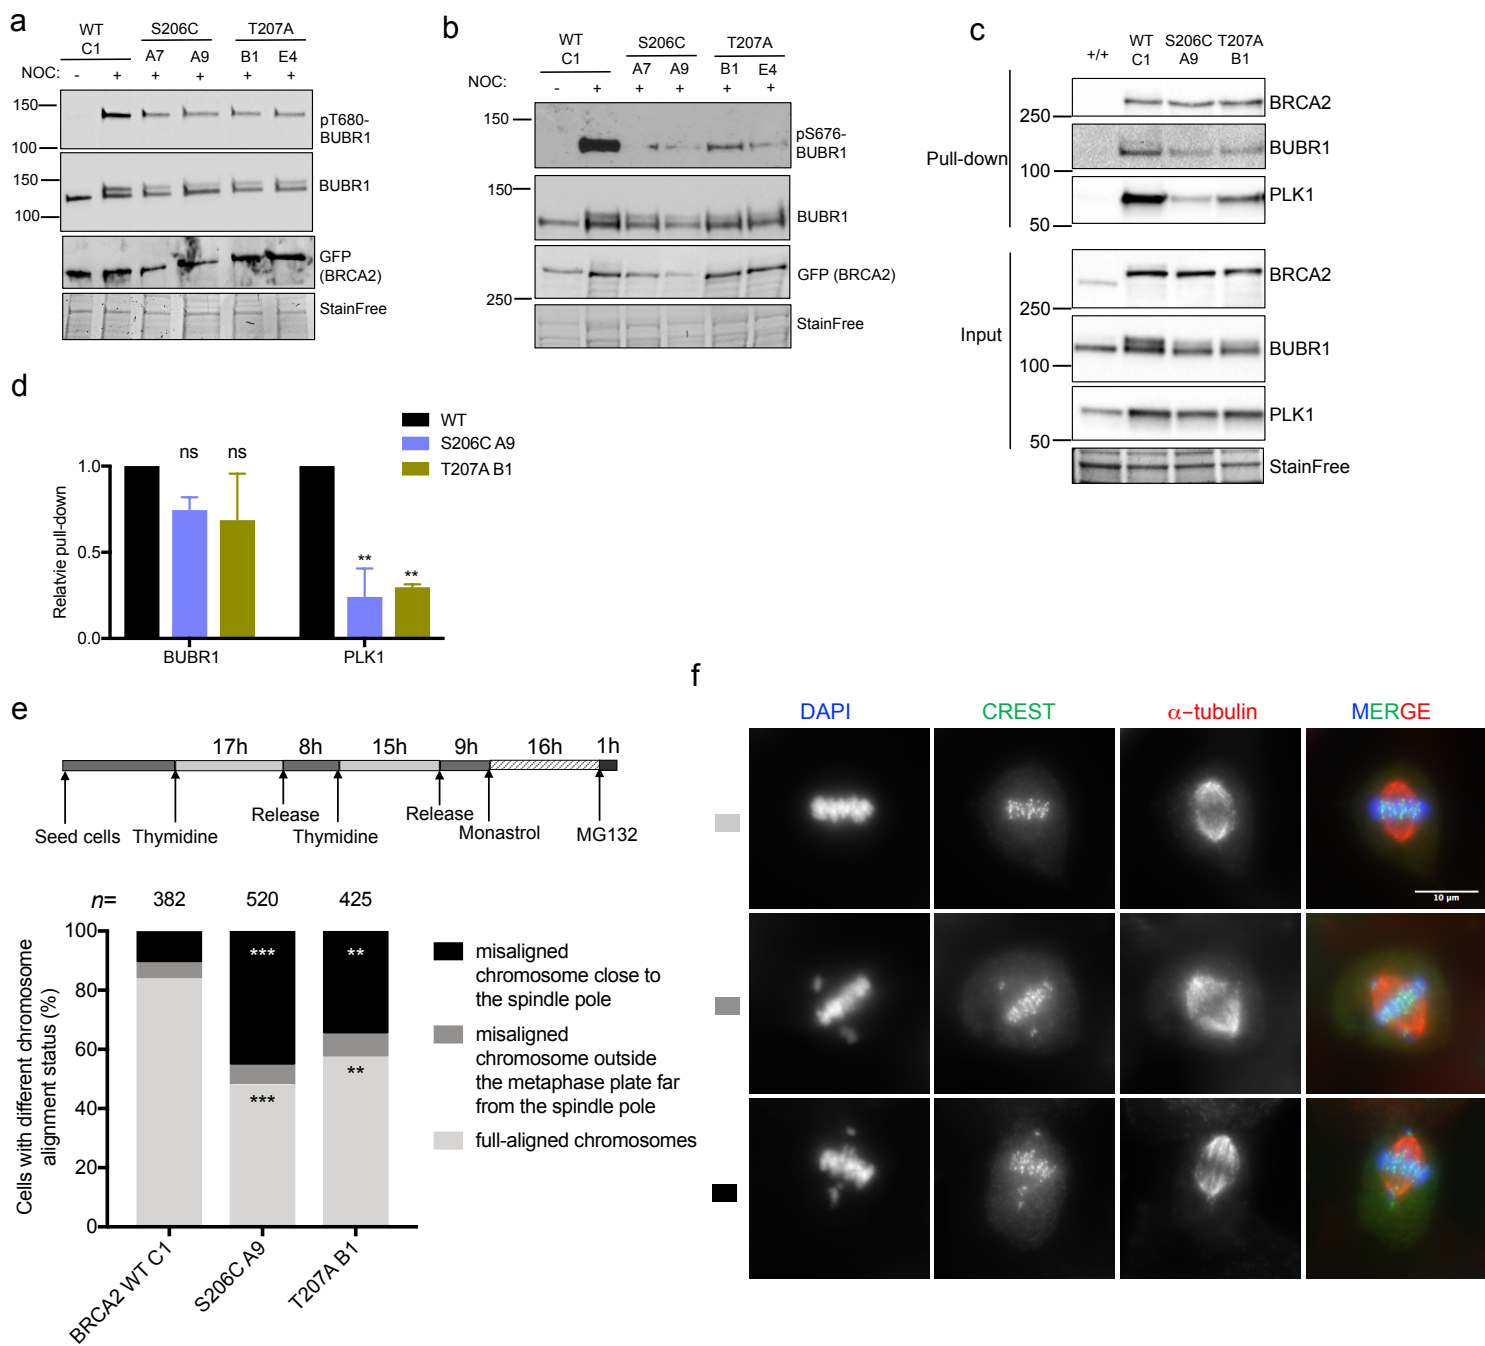

Figure 6

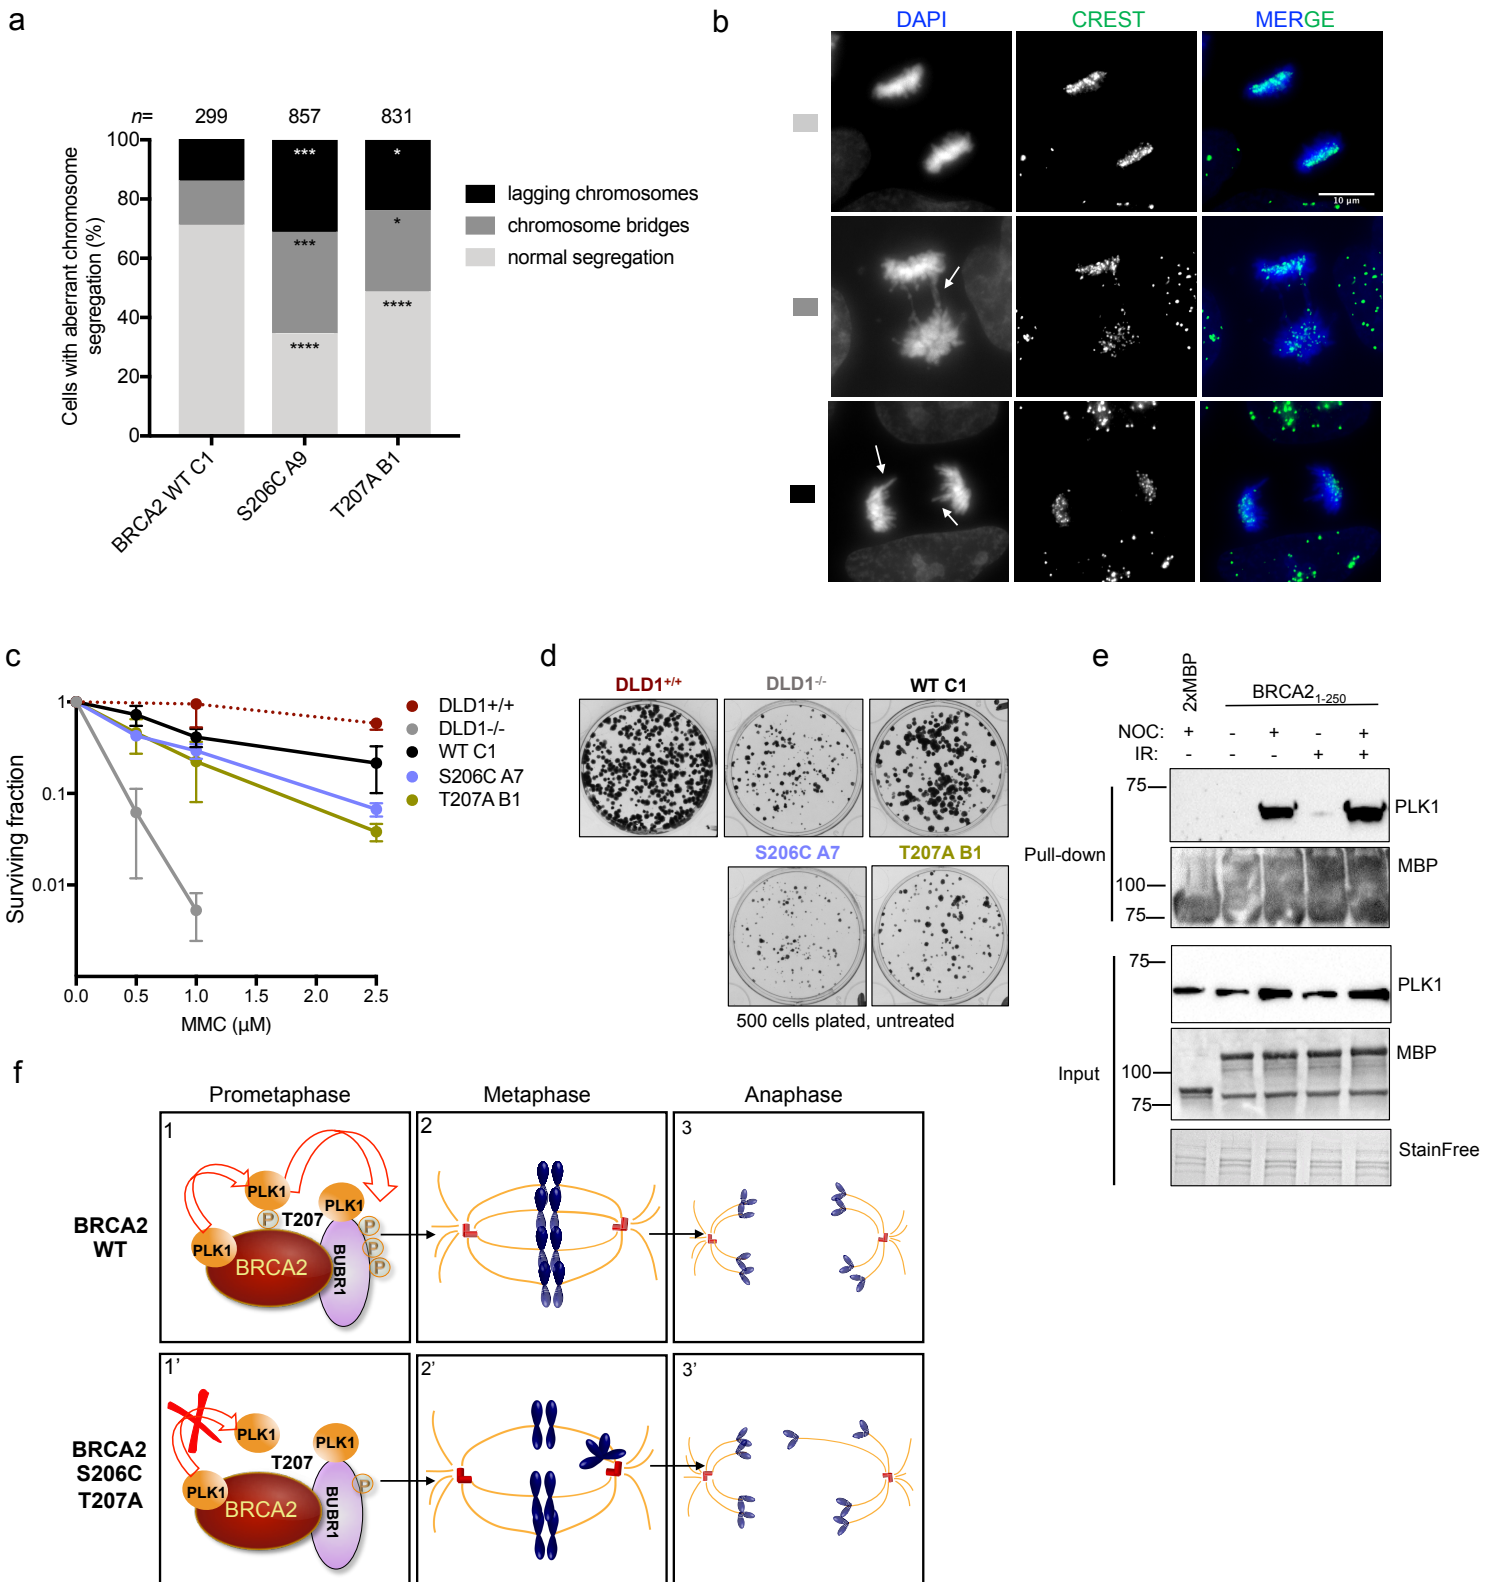

Figure 7
