# Supplementary material for: Proper chromosome alignment depends on BRCA2 phosphorylation by PLK1
Source: bioRxiv or medRxiv preprint supplement (doi:10.1101/265934), 2019-10-26
Supplement: Supplementary file [file 265934-1.pdf]

## Supplementary information

### Materials and Methods, Table S1-S7, Figure legends S1-S5

#### Materials and Methods

**Table S1:** Introducing point mutations in EGFPMBP-BRCA2, 2xMBP-BRCA2<sub>1-250</sub> and GST-BRCA2<sub>190-283</sub> constructs

| Mutation | Oligo name  | Sequence (5'-3')                            |
|----------|-------------|---------------------------------------------|
| S193A    | Fw : oAC543 | CCC ACC CTT AGT TCT GCT GTG CTC ATA GTC     |
|          | Rv : oAC544 | GAC TAT GAG CAC AGC AGA ACT AAG GGT GGG     |
| M192T    | Fw : oAC283 | GTGGATCCTGATACGTCTTGGTCAAGTTC               |
|          | Rv : oAC284 | GA ACT TGA CCA AGA CGT ATC AGG ATC CAC      |
| S196N    | Fw : oAC026 | CCTGATATGTCTTGGTCAAATTCCTTTAGCTACACCACC     |
|          | Rv : oAC027 | GGTGGTGTAGCTAAAGAATTTGACCAAGACATATCAGG      |
| S206C    | Fw : oAC028 | CCACCCACCCTTAGTTGTACTGTGCTCATAGTCAG         |
|          | Rv : oAC029 | CTGACTATGAGCACAGTACAACCTAAGGGTGGGTGG        |
| T200K    | Fw : oAC285 | CAA GTT CTT TAG CTA AAC CAC CCA CCC TTA G   |
|          | Rv : oAC286 | CTA AGG GTG GGT GGT TTA GCT AAA GAA CTT G   |
| T207A    | Fw : oAC545 | GGA TCC TGA TAT GGC TTG GTC AAG TTC TTT AGC |
|          | Rv : oAC546 | GCT AAA GAA CTT GAC CAA GCC ATA TCA GGA TCC |

**Table S2:** Sequencing primers

| Construct                                  | Oligo name  | Binding site    | Sequence (5'-3')               |
|--------------------------------------------|-------------|-----------------|--------------------------------|
| GFPMBP-BRCA2, GST-BRCA2 <sub>190-283</sub> | Rv : oAC131 | aa 273<br>BRCA2 | TTAGTTCGACTTATCCAATGTGGTCTTT   |
| 2xMBP-BRCA2 <sub>1-250</sub>               | Fw : oAC149 | aa 1-6<br>BRCA2 | TTATTTGCTAGCCCTATTGGATCCAAAGAG |

**Table S3:** Primers to clone BRCA2<sub>192-283</sub> into the pGEX-6P-1 vector

| Construct                              | Oligo name | Sequence (5'-3')                        |
|----------------------------------------|------------|-----------------------------------------|
| Amplifying<br>BRCA2 <sub>192-283</sub> | Fw: oAC130 | TTAGGATCCATGTCTTGGTCAAGTTCT             |
|                                        | Rv: oAC131 | TTAGTTGACTTATCCAATGTGGTCTTT             |
| L191D in NTshort                       | Fw: oAC593 | CAG GGG CCC GAT ATG TCT TGG TCA AGT TCT |
|                                        | Rv: oAC594 | AGA ACT TGA CCA AGA CAT ATC GGG CCC CTG |

**Table S4:** Primers used to clone *PLK1* into pFastBac HT

| Primer name  | Sequence (5'-3')                                           |
|--------------|------------------------------------------------------------|
| GA_pFBtev_R  | GCCCTGAAAATACAGGTTTTTCGGTCGTTGGGAT                         |
| GA_pFB_UTR_F | TTGTCGAGAAGTACTAGAGGATCATAATCA                             |
| GA_hPLK_F    | ATCCCAACGACCGAAAACCTGTATTTTCAGGGCATGAGTGCTGCAG<br>TGACTGCA |
| GA_hPLK_R    | TGATTATGATCCTCTAGTACTTCTCGACAATTAGGAGGCCTTGAGAC<br>GGTT    |

**Table S5:** Primers used to clone PLK1<sub>PBD</sub> (aa 326-603) into pT7-His6-SUMO

| Primer name   | Sequence (5'-3')                                       |
|---------------|--------------------------------------------------------|
| GA_PLKPDBwt_F | ATTGAGGCTCACCGCGAACAGATTGGTGGCTCGATTGCTCCCA<br>GCAGCCT |
| GA_PLKPDBwt_R | TTCCTTTCGGGCTTTGTTAGCAGCCGGTCATTAGGAGGCCTTGA<br>GACGGT |

**Table S6:** Peptide sequences for Isothermal Titration Calorimetry (ITC)

| Peptide | Sequence             |
|---------|----------------------|
| pS197   | DMSWSS{pS}LAT        |
| T207    | WSSSLATPPTLSSTVLI    |
| pT207   | WSSSLATPPTLSS{pT}VLI |
| T207A   | WSSSLATPPTLSSAVLI    |
| CpT207  | WSSSLATPPTLSC{pT}VLI |

**Table S7:** Primers for amplifying BRCA2 (aa 1-267) from genomic DNA,

| Primer name | Sequence (5'-3')                          |
|-------------|-------------------------------------------|
| Fw : OAC035 | GGTCGTCAGACTGTCGATGAAGCC                  |
| Rv : OAC056 | CAAAGAGAAGCTGCAAGTCATGGATTTGAAAAACATCAGGG |

### Figure Legends

#### Figure S1. PLK1 phosphorylation kinetics of BRCA2<sub>190-283</sub> and conservation of PLK1 phosphosites

**(a)** Related to Figure 1. Phosphorylation kinetics resulting from a duplicate experiment performed with a different PLK1 kinase aliquot on <sup>15</sup>N labelled BRCA2<sub>190-283</sub> (283K, 600 MHz). Error bars correspond to SD (n=2). **(b)** Alignment of the region 190-283 of BRCA2 in 30 different species. Amino acids conserved in more than 66 % of the species are highlighted with coloured background. The percentage of identity to human BRCA2 sequence is added after the species name. Arrows show the amino acids identified as phosphorylated by PLK1 in the NMR experiments. **(c)** Bar graph showing the evolutionary conservation of the amino acids phosphorylated by PLK1 detected by NMR.

**Figure S2. Related to Figure 2. PLK1 phosphorylation kinetics of WT vs mutated forms of BRCA2<sub>190-283</sub>**

Phosphorylation kinetics resulting from a duplicate experiment performed with a different PLK1 kinase aliquot on <sup>15</sup>N labelled BRCA2<sub>190-283</sub> (283K, 600 MHz). Comparisons of the WT kinetics with the phosphorylation kinetics of **(a)** T207A and **(b)** T200K are displayed.

**Figure S3. Related to Figure 4. Isothermal Titration Calorimetry (ITC) thermogram showing binding of PLK1<sub>PBD</sub> to the fragment BRCA2<sub>190-283</sub> or a 10 aa BRCA2 peptide containing pS197**

Thermogram showing the binding affinity of PLK1<sub>PBD</sub> to **(a)** phosphorylated or the **(b)** non-phosphorylated BRCA2<sub>190-283</sub> fragment. **(c)** Thermogram showing the binding affinity of PLK1<sub>PBD</sub> to a 10 aa BRCA2 peptide comprising pS197.

**Figure S4. Related to Figures 5-7. EGFP-MBP-BRCA2 levels and the cell cycle profiles of the DLD1<sup>-/-</sup> stable clones utilized in this study and the levels of pT680-BUBR1 in DLD1<sup>-/-</sup> WT clone after PLK1 inhibition and phosphatase treatment**

**(a)** Protein levels of EGFP-MBP-BRCA2 WT or the VUS (S206C and T207A) in total protein extracts from respective DLD1<sup>-/-</sup> stable clones analyzed by western blot using anti-BRCA2 (OP95) and anti-GFP antibodies. **(b, c)** Cell cycle distribution of DLD1<sup>-/-</sup> stable clones expressing EGFP-MBP-BRCA2 WT or the VUS treated with nocodazole **(b)** or DMSO **(c)** as in Figure 5c. Statistical significance of differences was calculated with two-way ANOVA test with Tukey's multiple comparisons test (the

asterisks show differences compared to WT; ns  $p > 0.05$ , \*  $p \leq 0.05$ , \*\*  $p \leq 0.01$ , \*\*\*  $p \leq 0.001$ , \*\*\*\*  $p \leq 0.0001$ ). **(d)** Protein levels of pT680-BUBR1 in DLD1<sup>-/-</sup> BRCA2 WT stable clone after treatment with PLK1 inhibitors. After 14h culture with media containing nocodazole (100 ng/ $\mu$ l), PLK1 inhibitors (Bi2536 (50 nM) or BTO (50  $\mu$ M)) were added to the media and the cells were cultured for additional 2h before harvesting and extraction of proteins. The levels of pT680-BUBR1 in total protein lysate was analyzed by western blot. **(e)** Phosphatase (Fast AP phosphatase) treatment of total protein lysate extracted from nocodazole (100 ng/ $\mu$ l) treated DLD1<sup>-/-</sup> BRCA2 WT stable clone, levels of pT680-BUBR1 was analyzed by western blot. For (a, d and e), stain-free images of the 4-15% SDS-PAGE gel before transfer were used as loading control (cropped images are shown).

### **Figure S5. Purification of PLK1 and PLK1<sub>PBD</sub> protein**

**(a)** SDS-PAGE showing purified PLK1. Human PLK1 was expressed and purified from sf9 insect cells using Ni-NTA column followed by a second purification step with a cationic exchange Canto S column. The purified protein was loaded on a 4-20% SDS-PAGE (3  $\mu$ g) and detected by Coomassie staining. **(b)** SDS-PAGE showing purified PLK1<sub>PBD</sub>. 6His-Sumo-PLK1<sub>PBD</sub> was expressed and purified from bacteria using a His-TRAP column, the His-tag was cleaved with 6xHis-SUMO Protease and the cleaved PLK1<sub>PBD</sub> was further purified using Ni-NTA agarose resin. The purified protein was loaded on a 4-20% SDS-PAGE (1.4  $\mu$ g) and detected by Coomassie staining. **(c)** *In vitro* kinase assay with the purified PLK1 (0.1  $\mu$ g) from (a) or PLK1 purchased from Abcam, 0.1  $\mu$ g PLK1 was used in the kinase reaction with either RAD51 (25 ng) or purified 2xMBP-BRCA2<sub>1-250</sub> WT (0.5  $\mu$ g) as substrate in the

presence of  $\gamma^{32}\text{P}$ -ATP. The samples were resolved by 7.5 % SDS-PAGE and  $^{32}\text{P}$ -labeled products were detected by autoradiography.

a



b



c



Figure S1

a



b



Figure S2





Figure S3



Figure S4



Figure S5
