# Supplementary material for: Proper chromosome alignment depends on BRCA2 phosphorylation by PLK1
Source: bioRxiv or medRxiv preprint supplement (doi:10.1101/265934), 2019-10-26
Supplement: Supplementary file [file 265934-2.pdf]

a

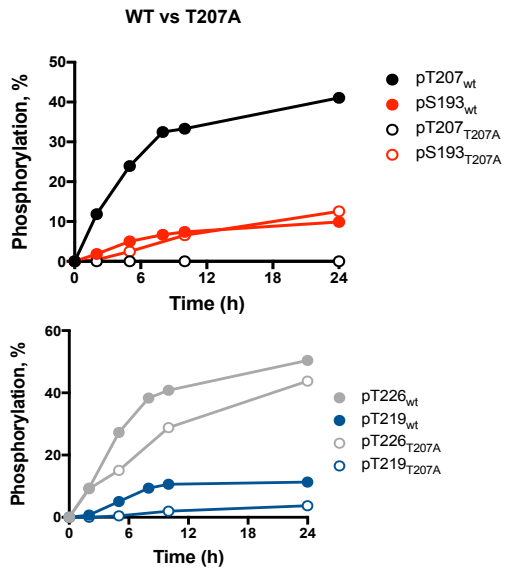

b

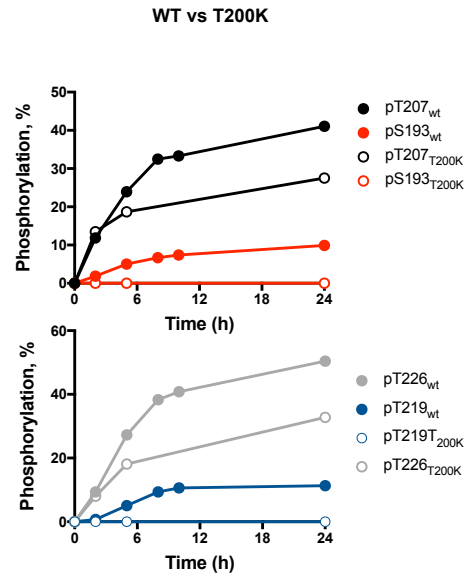

Figure S2
