# Supplementary material for: Proper chromosome alignment depends on BRCA2 phosphorylation by PLK1
Source: bioRxiv or medRxiv preprint supplement (doi:10.1101/265934), 2019-10-26
Supplement: Supplementary file [file 265934-2.pdf]

a

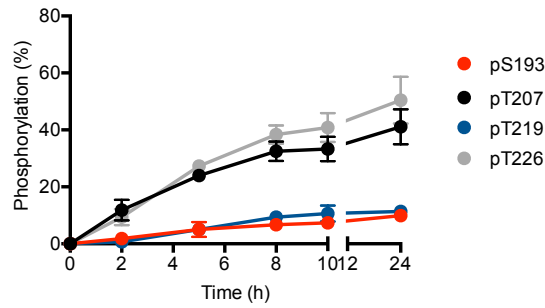

b

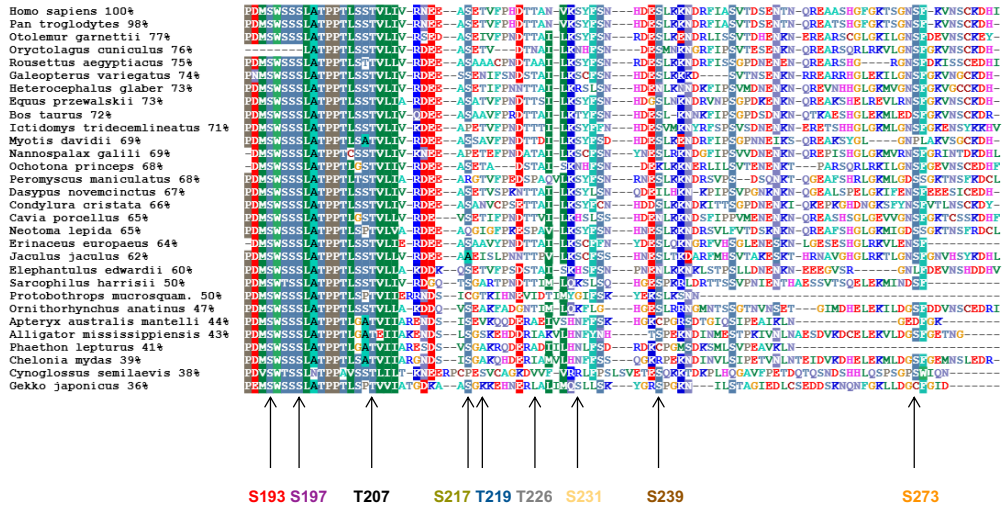

c

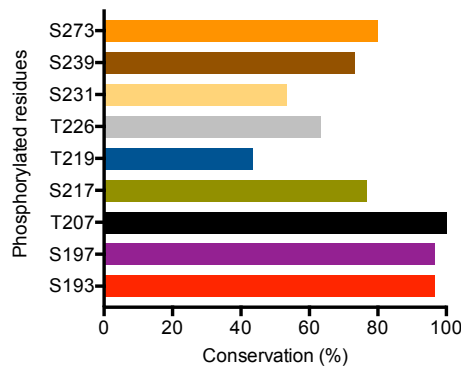

Figure S1

a

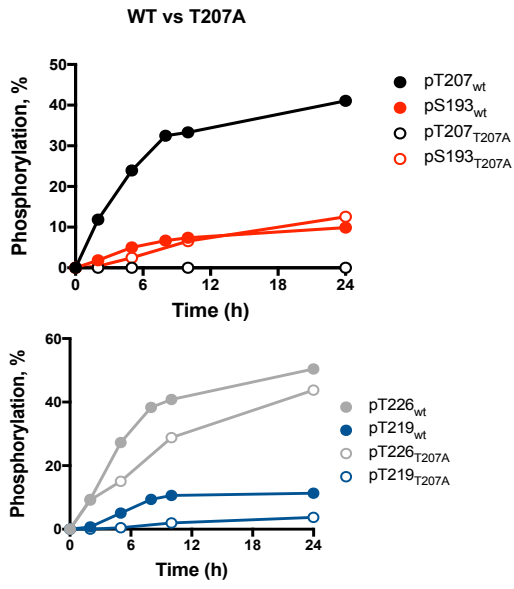

b

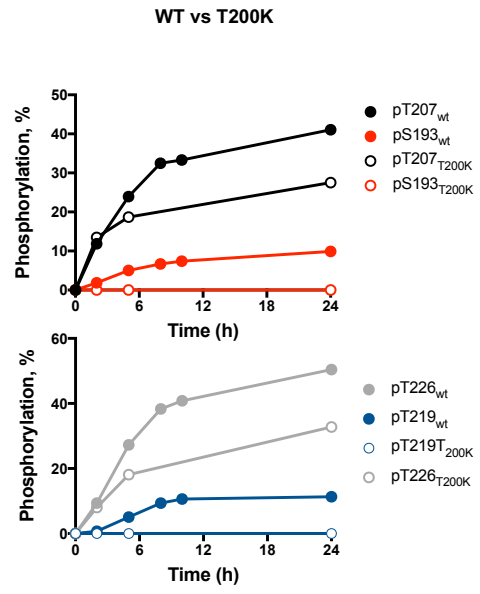

Figure S2

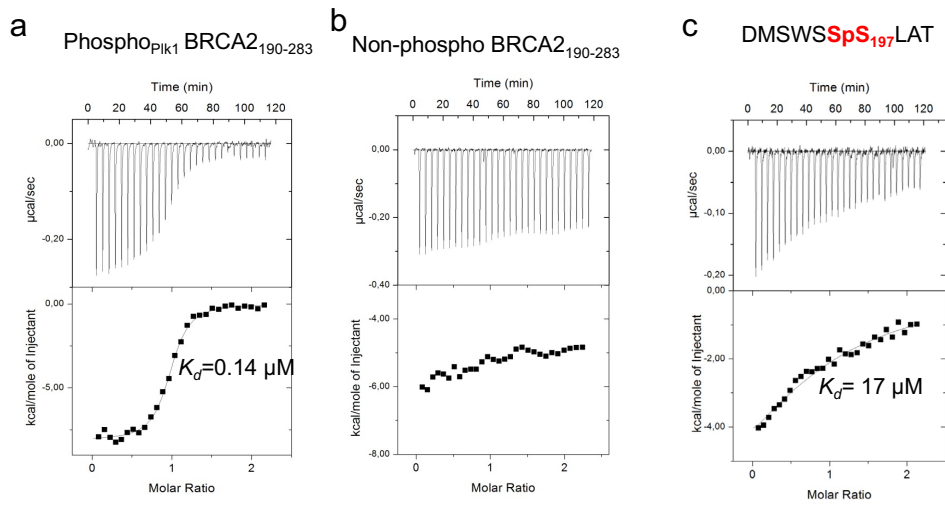

Figure S3

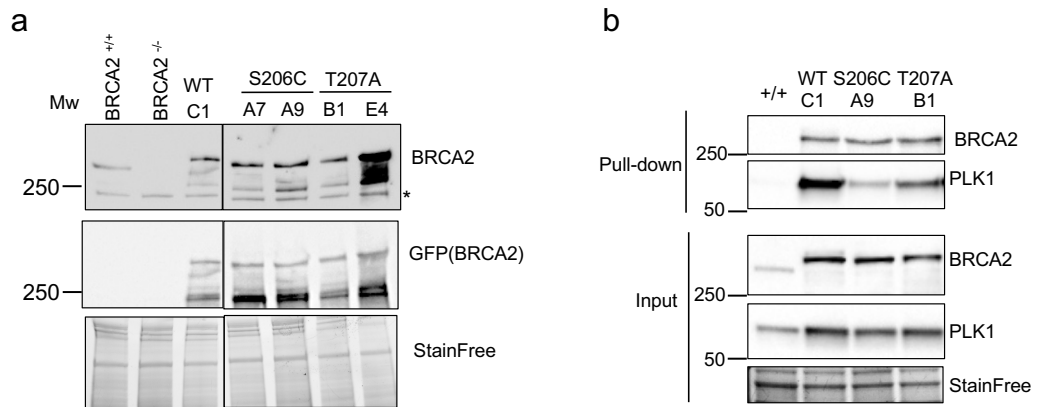

Figure S4

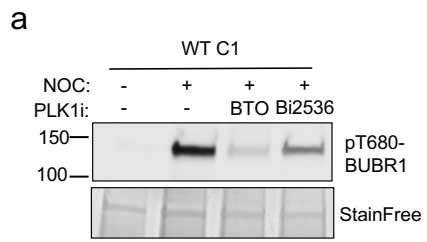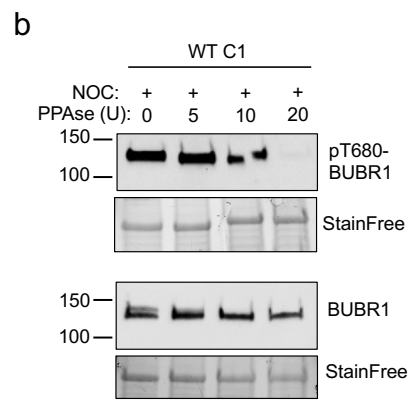

Figure S5

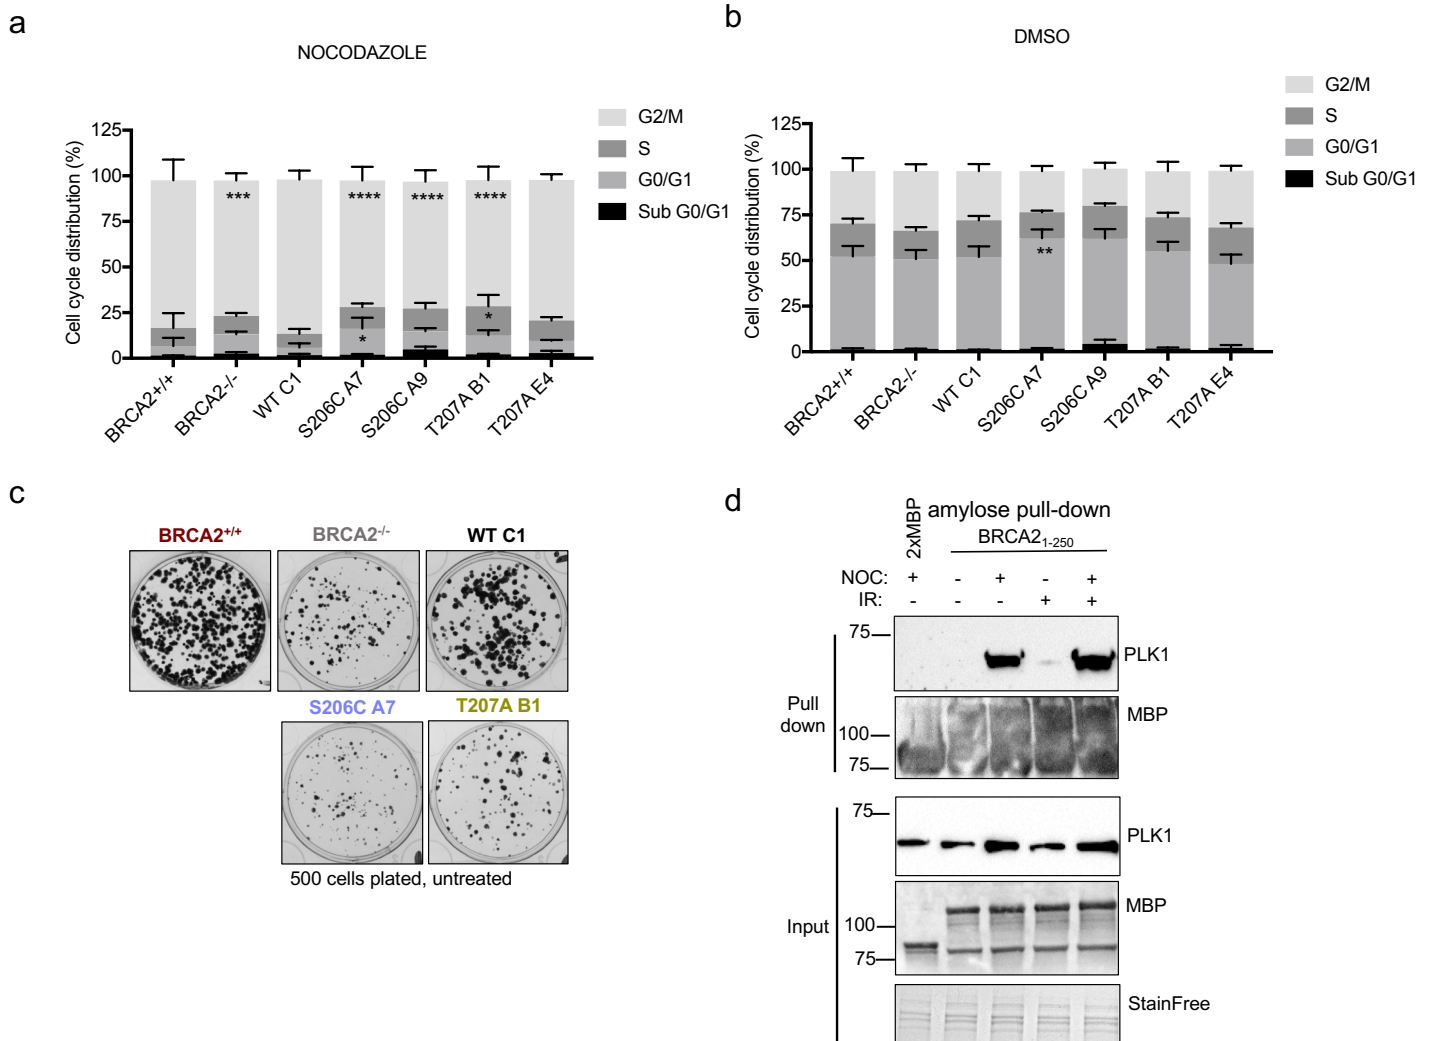

Figure S6

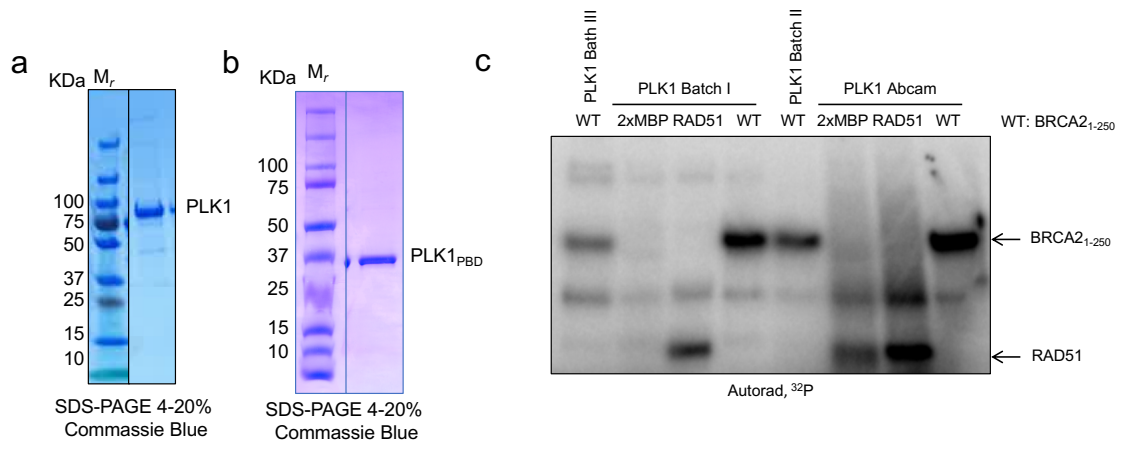

Figure S7
