# Supplementary material for: Proper chromosome alignment depends on BRCA2 phosphorylation by PLK1
Source: bioRxiv or medRxiv preprint supplement (doi:10.1101/265934), 2019-10-26
Supplement: Supplementary file [file 265934-2.pdf]

**a**

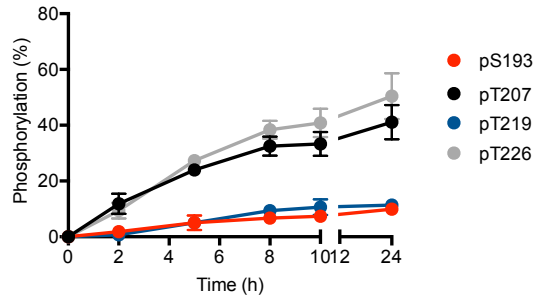

**b**

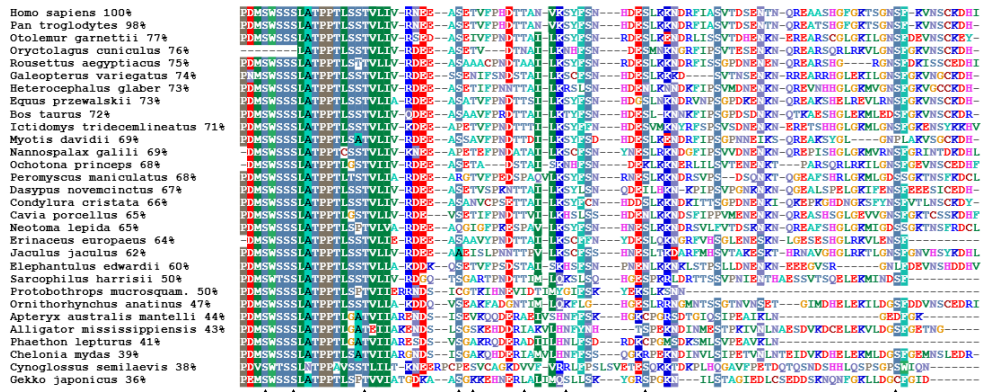

**c**

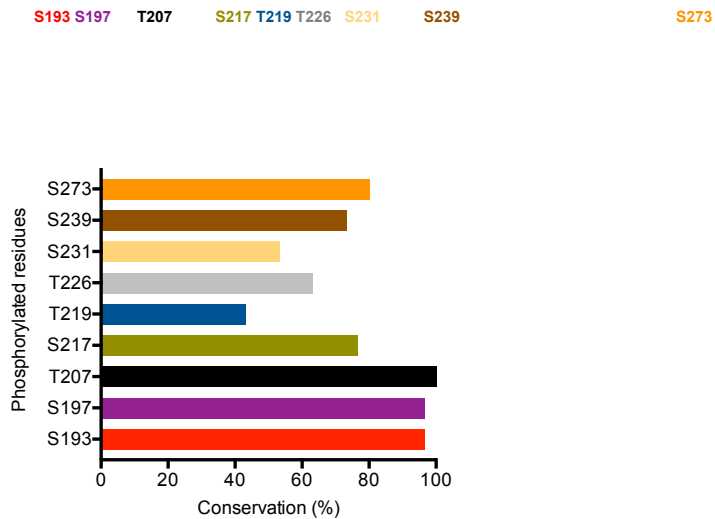

Figure S1

**a**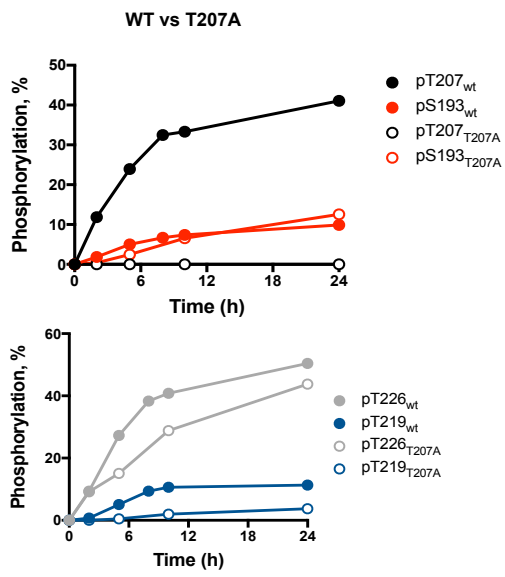**b**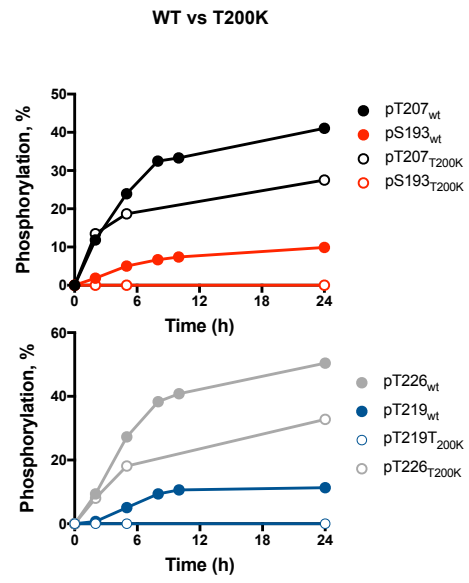

Figure S2

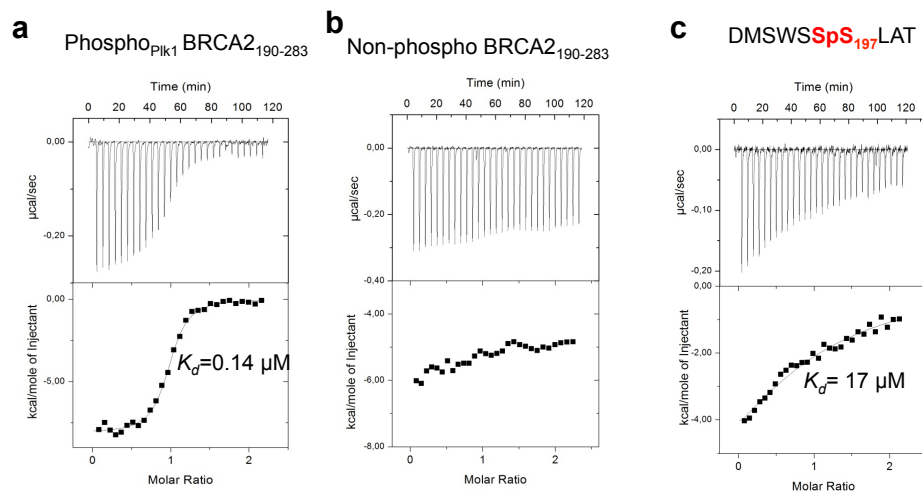

Figure S3

**a**

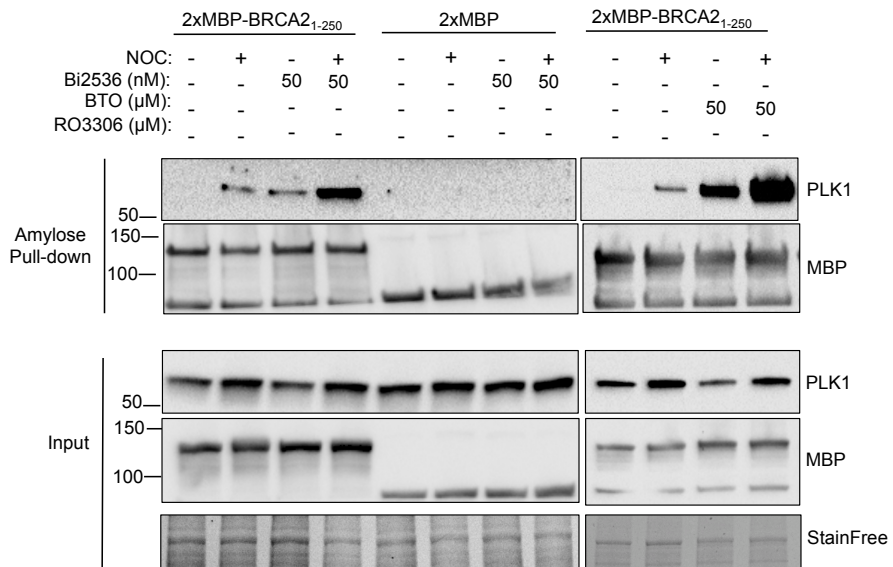

**b**

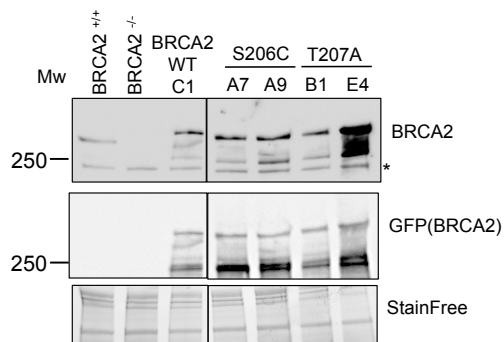

**c**

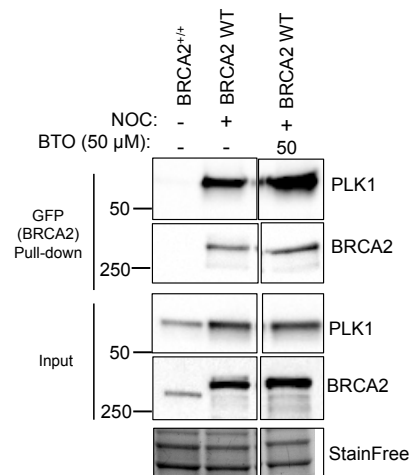

Figure S4

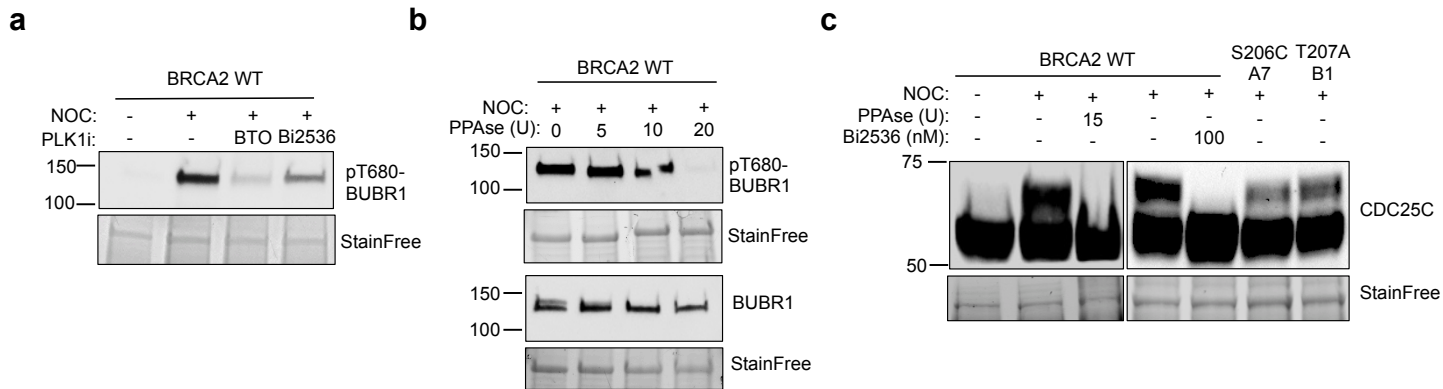

Figure S5

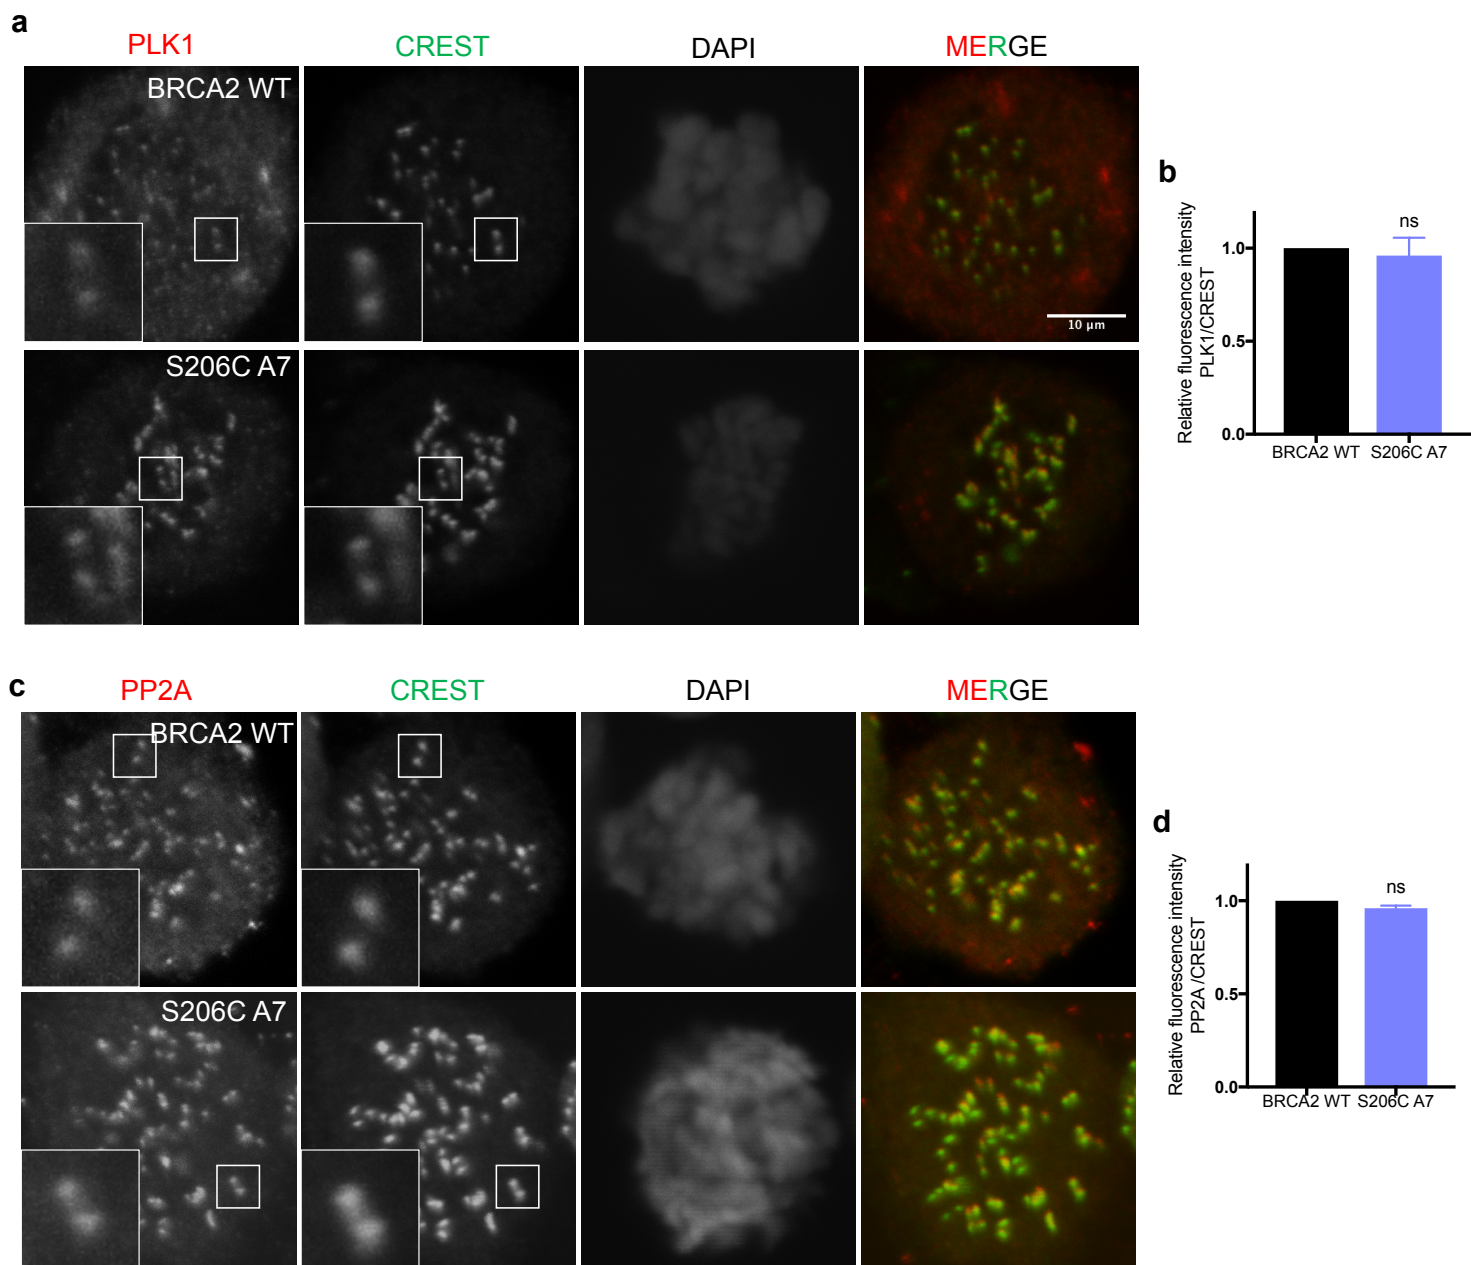

Figure S6

**a**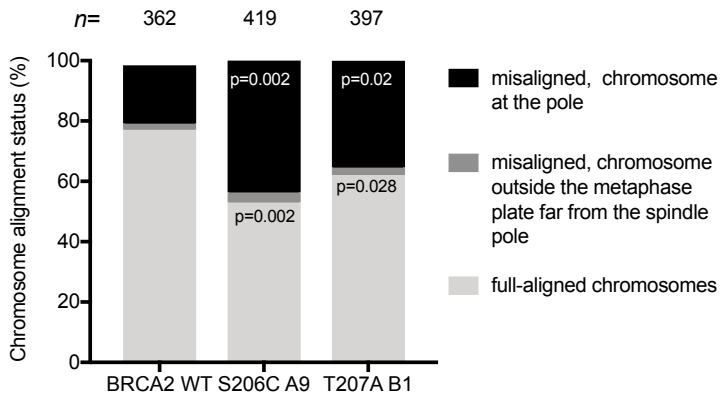**b**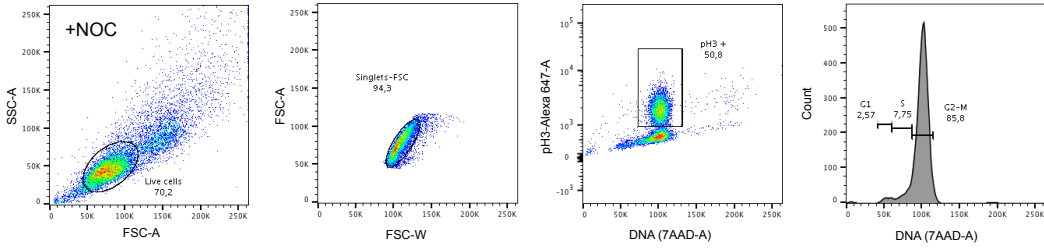**c**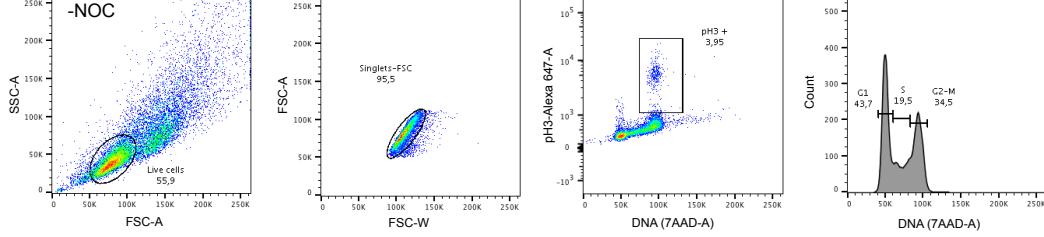**d**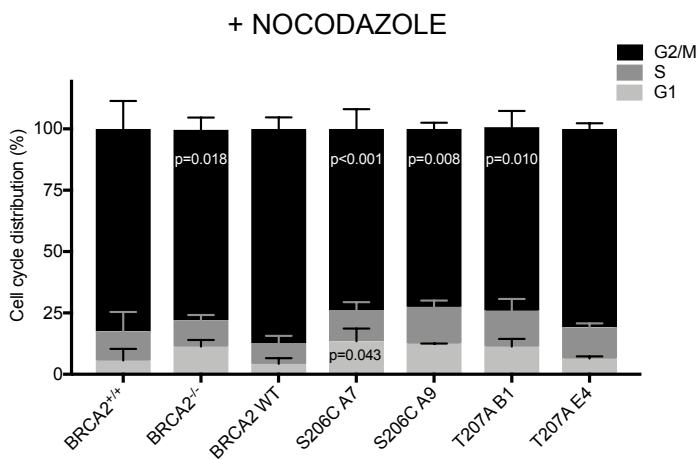**e**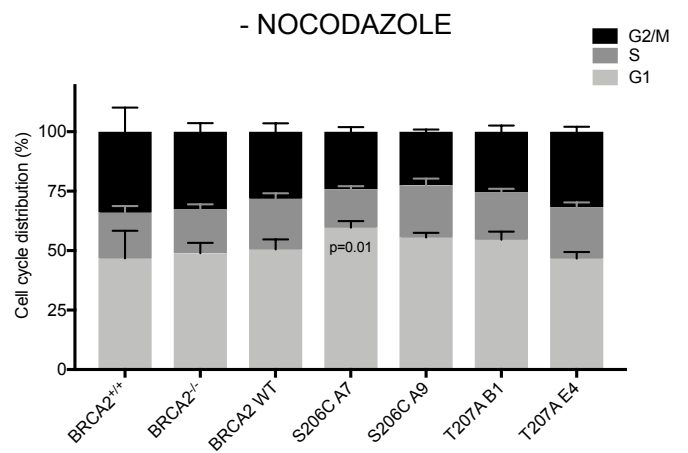

Figure S7

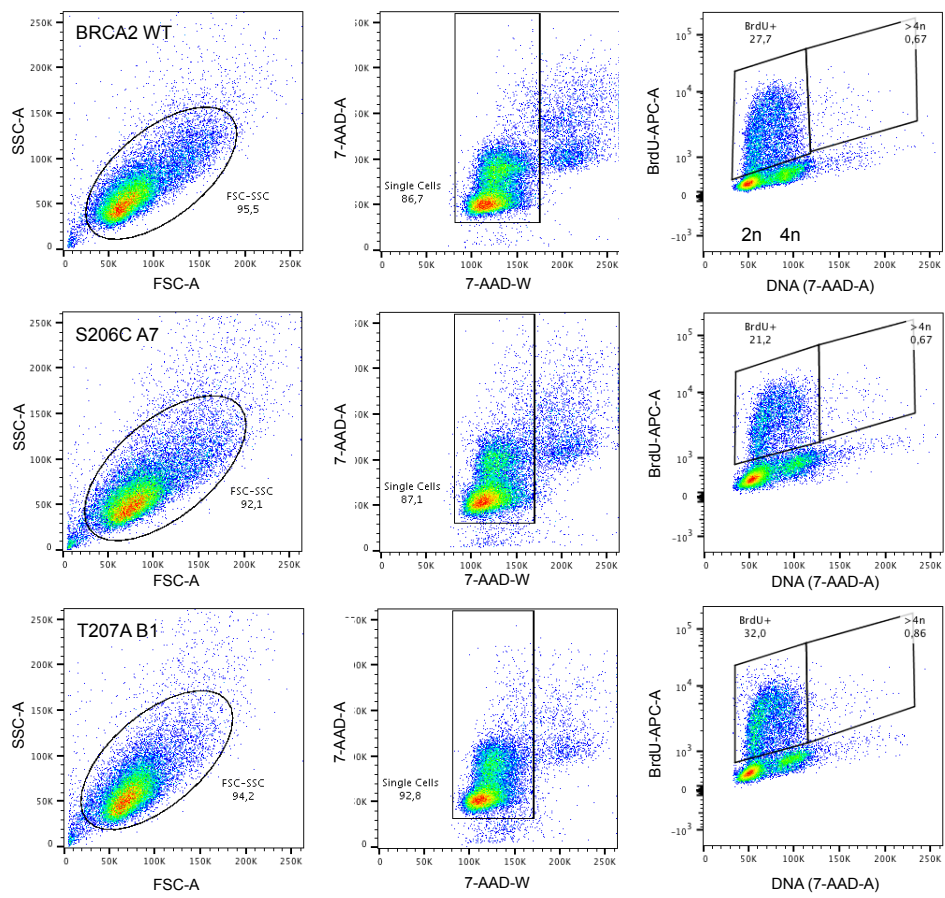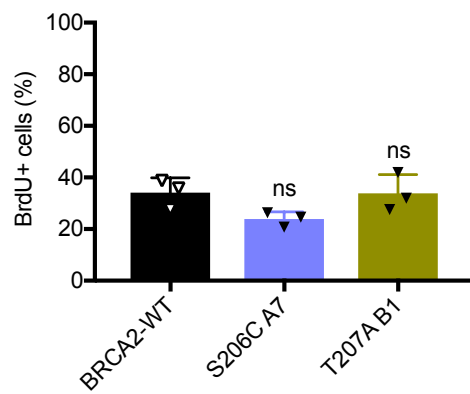

Figure S8



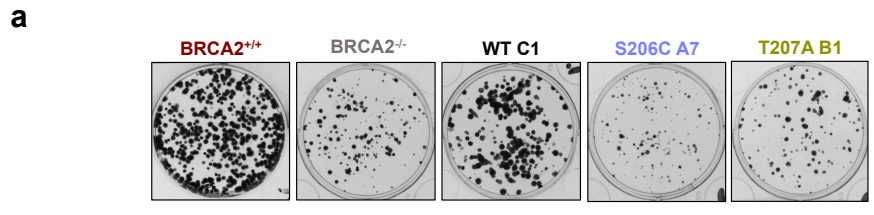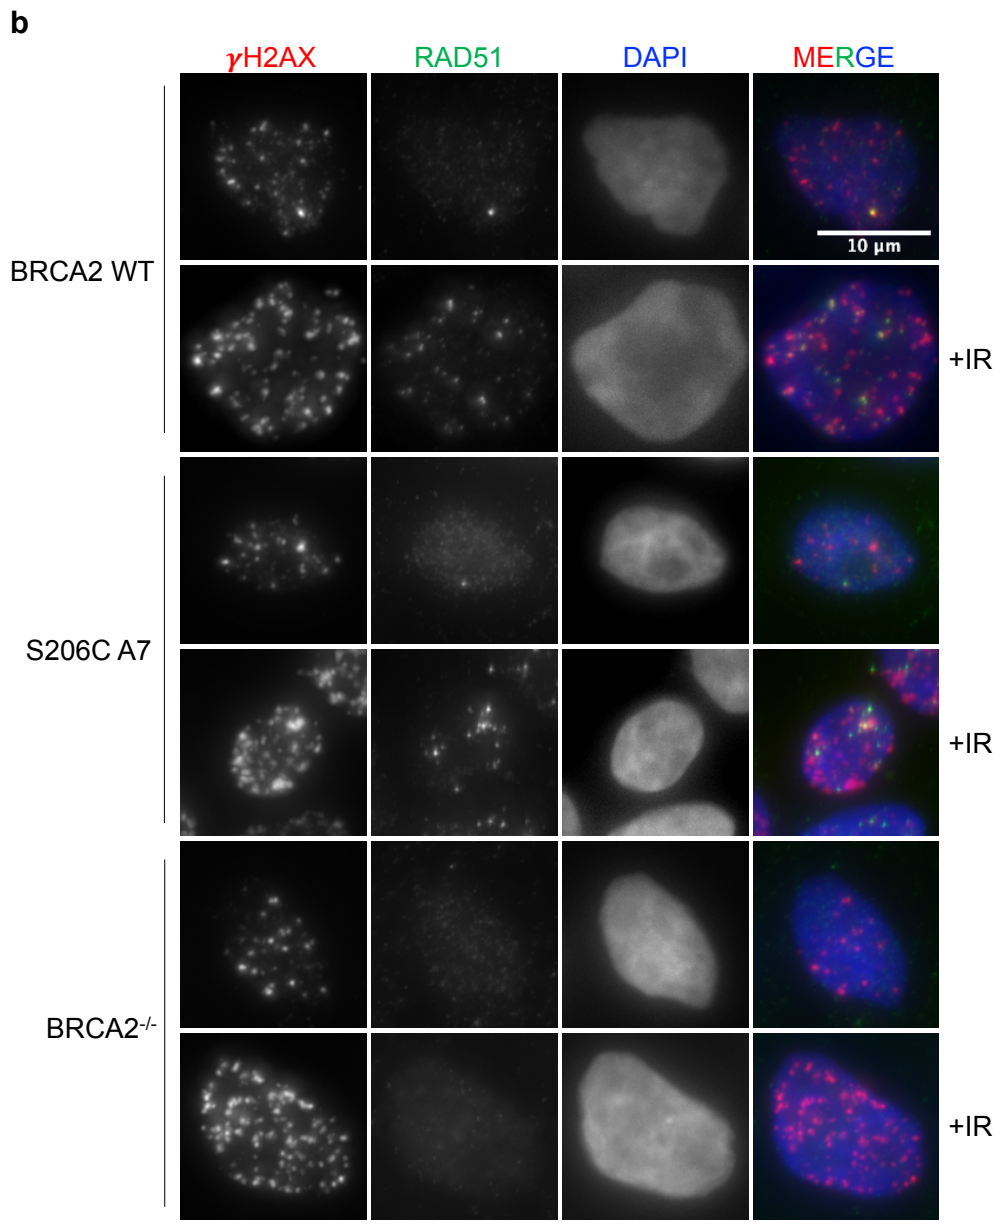

Figure S9

**a**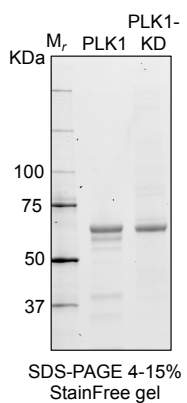**b**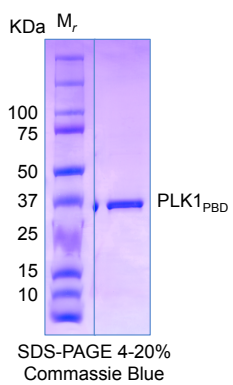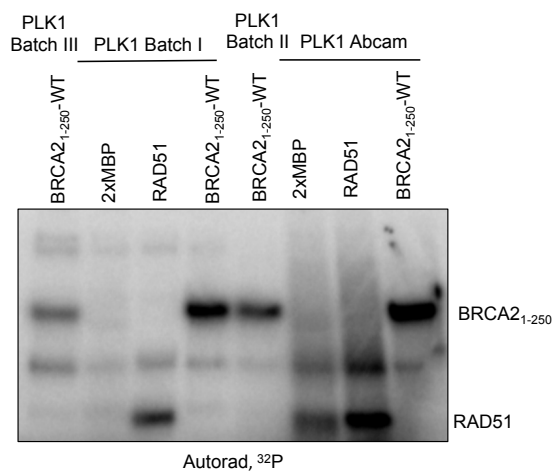

Figure S10
